# Supplementary material for: Experimental and computational evidence for KOt-Bu-promoted synthesis of oxopyrazino[1,2-a]indoles
Source: Royal Society of Chemistry journal article supplement (doi:10.1039/c5ra17056g), 2015-01-01
Supplement: c5ra17056g1.pdf [file c5ra17056g1.pdf]

## Supporting Information

### Experimental and Computational Evidences for KO<sup>t</sup>Bu-Promoted Synthesis of Oxopyrazino[1,2-*a*]indoles

*N*-(2-(Cyclohexylamino)-2-oxo-1-phenylethyl)-*N*-(prop-2-yn-1-yl)-1*H*-indole-2-carboxamide **1a**

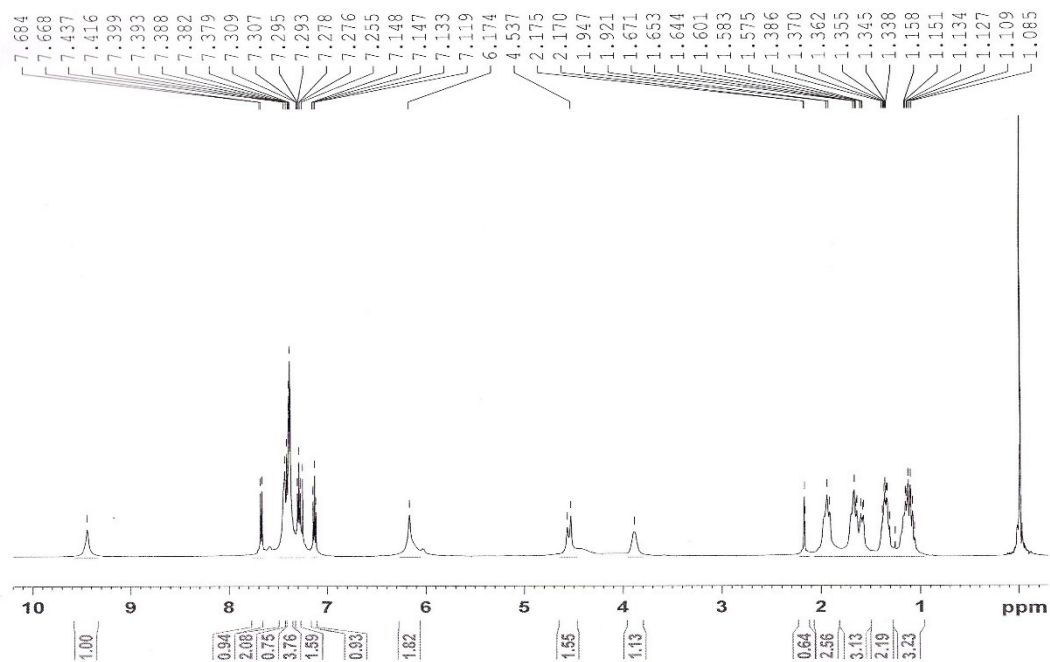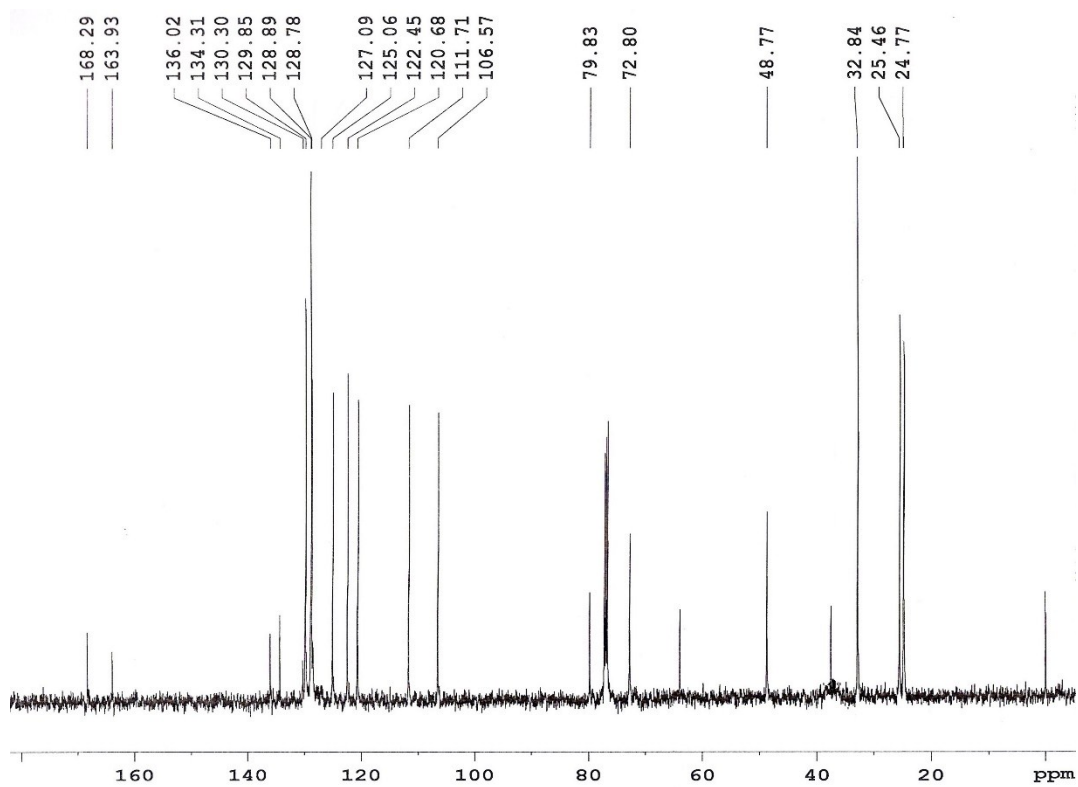

*N*-(2-(Cyclohexylamino)-2-oxo-1-(*p*-tolyl)ethyl)-*N*-(prop-2-yn-1-yl)-1*H*-indole-2-carboxamide **1b**

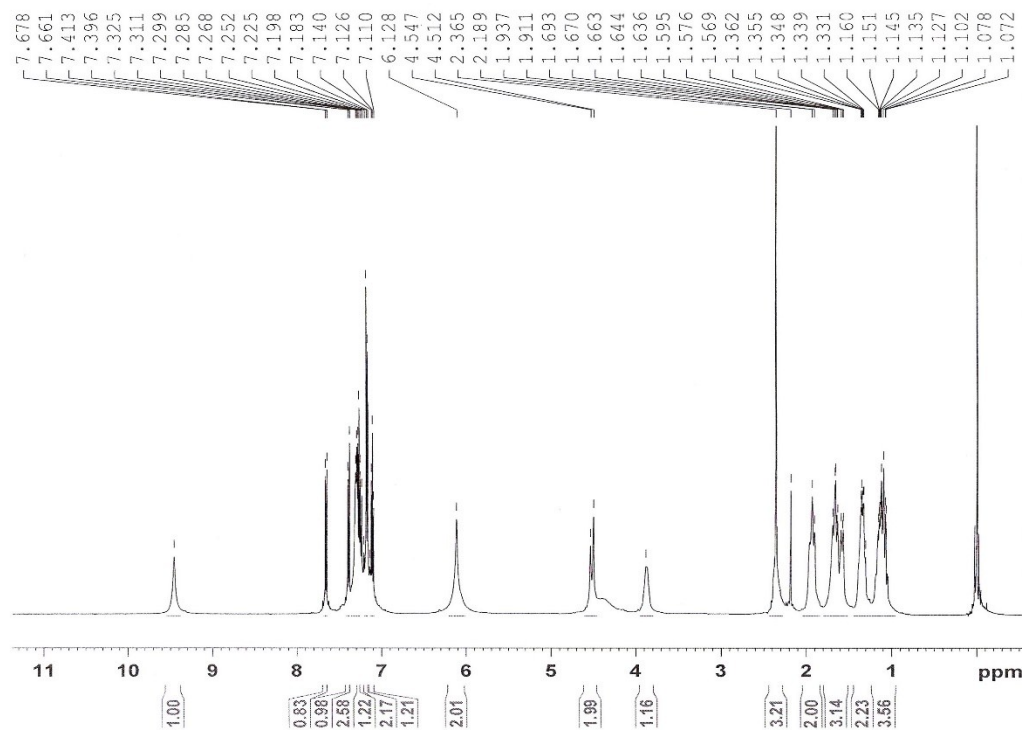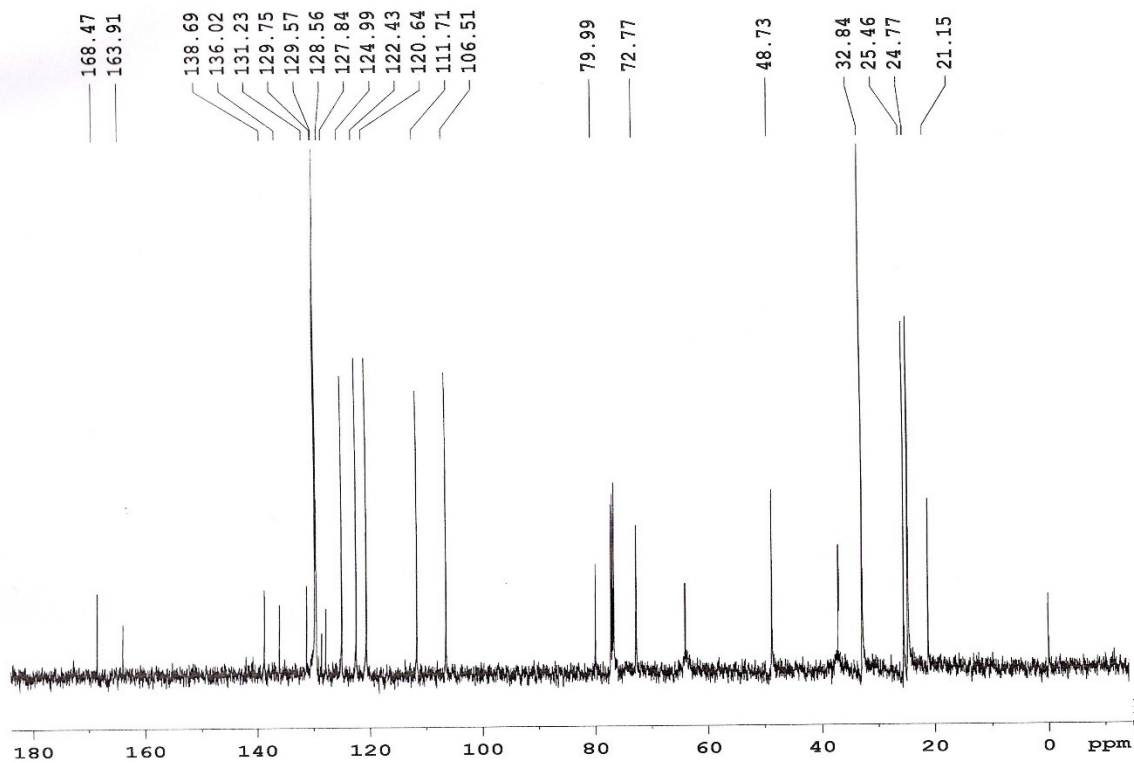

*N*-(2-(Cyclohexylamino)-1-(4-methoxyphenyl)-2-oxoethyl)-*N*-(prop-2-yn-1-yl)-1*H*-indole-2-carboxamide **1c**

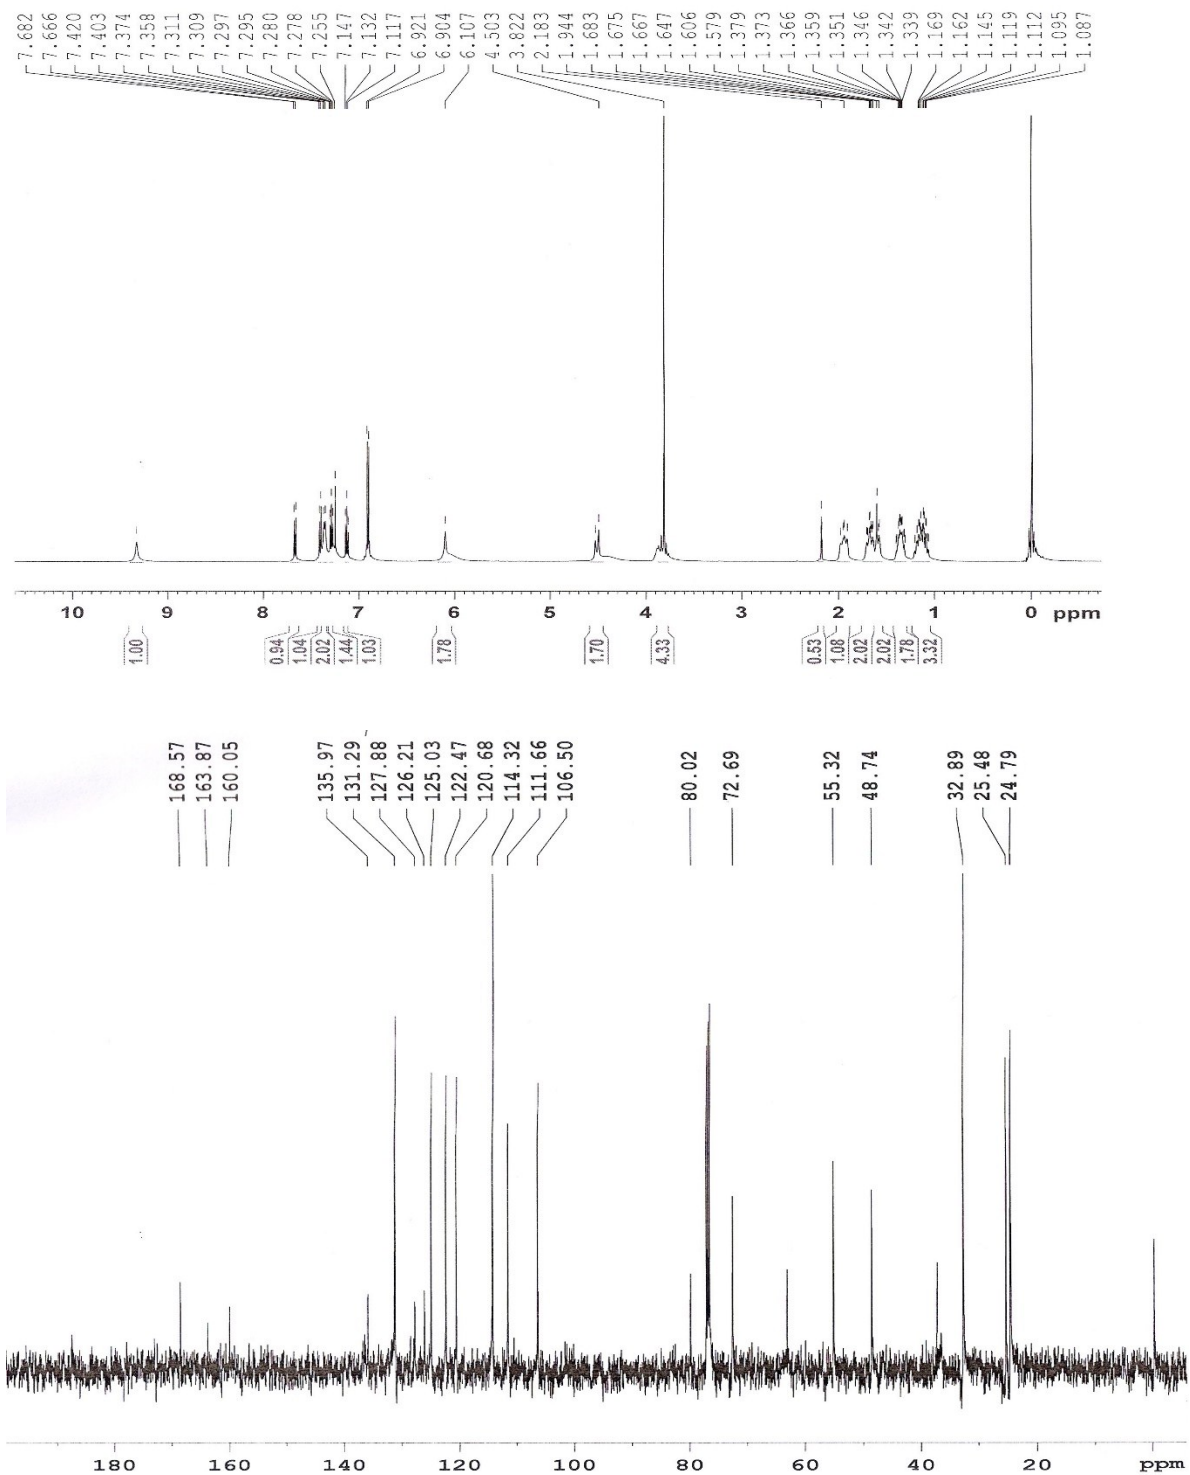

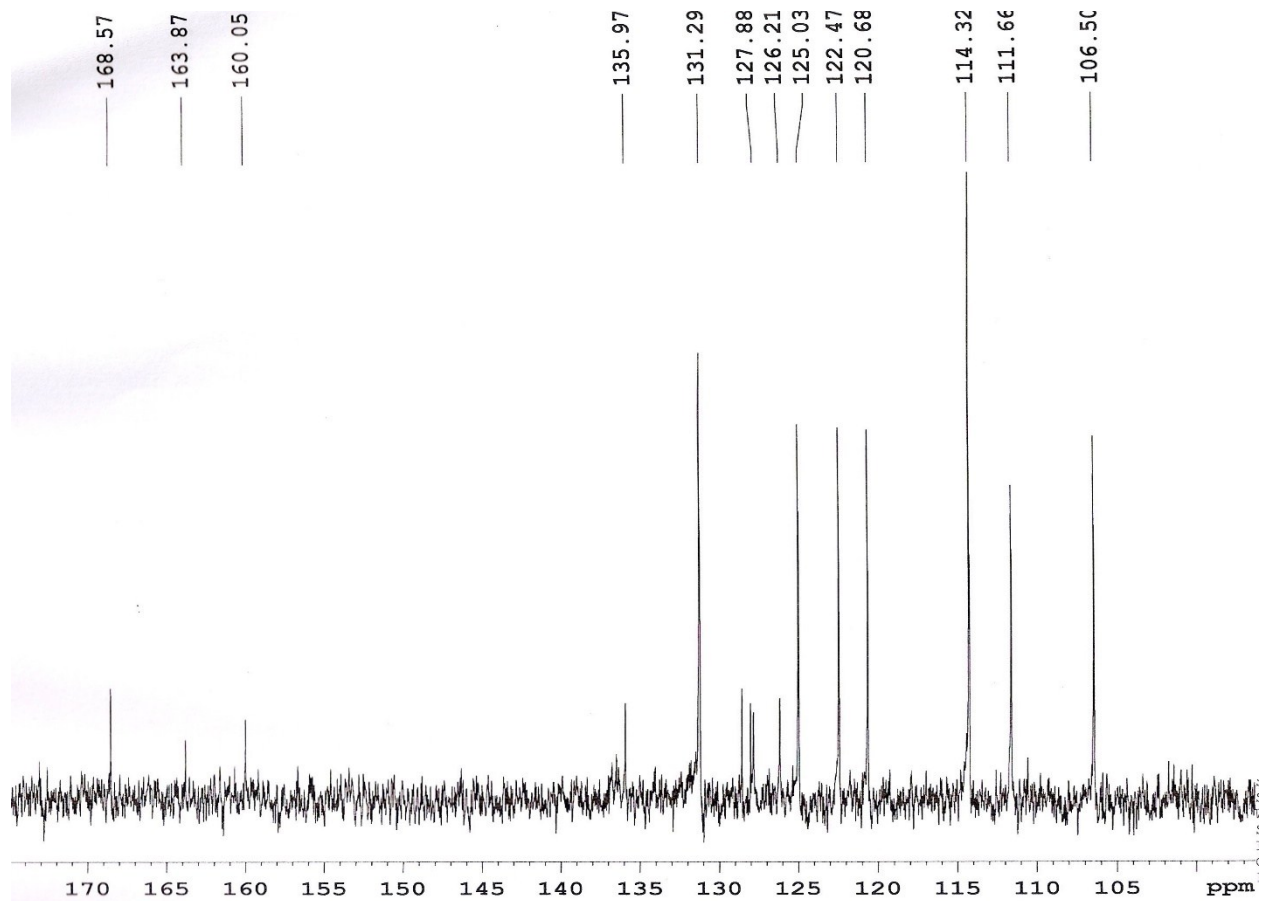

*N*-(1-(2-Chlorophenyl)-2-(cyclohexylamino)-2-oxoethyl)-*N*-(prop-2-yn-1-yl)-1*H*-indole-2-carboxamide **1d**

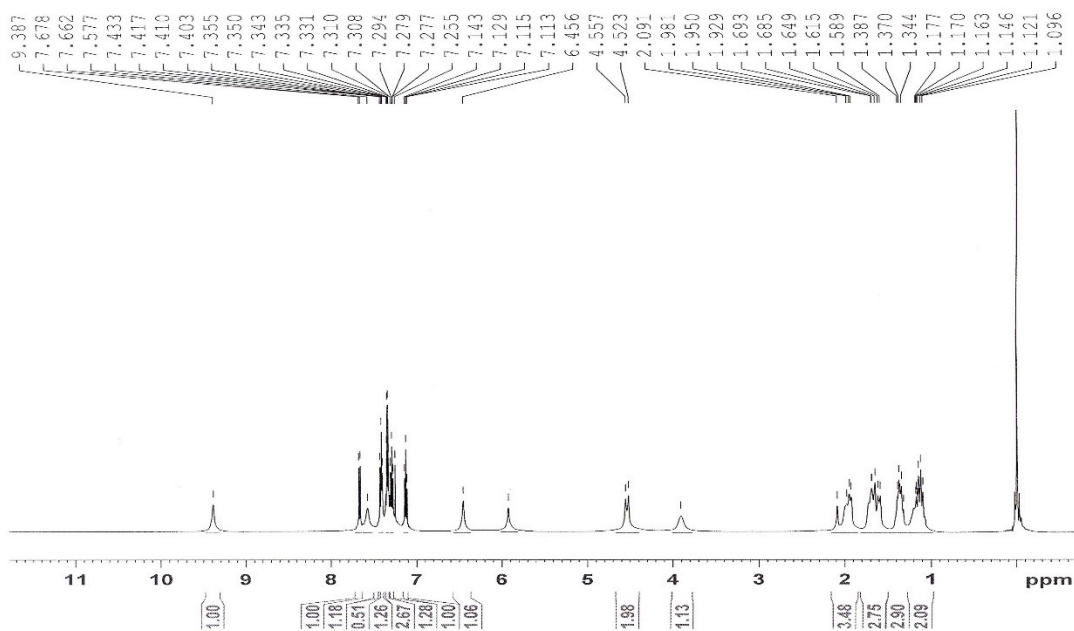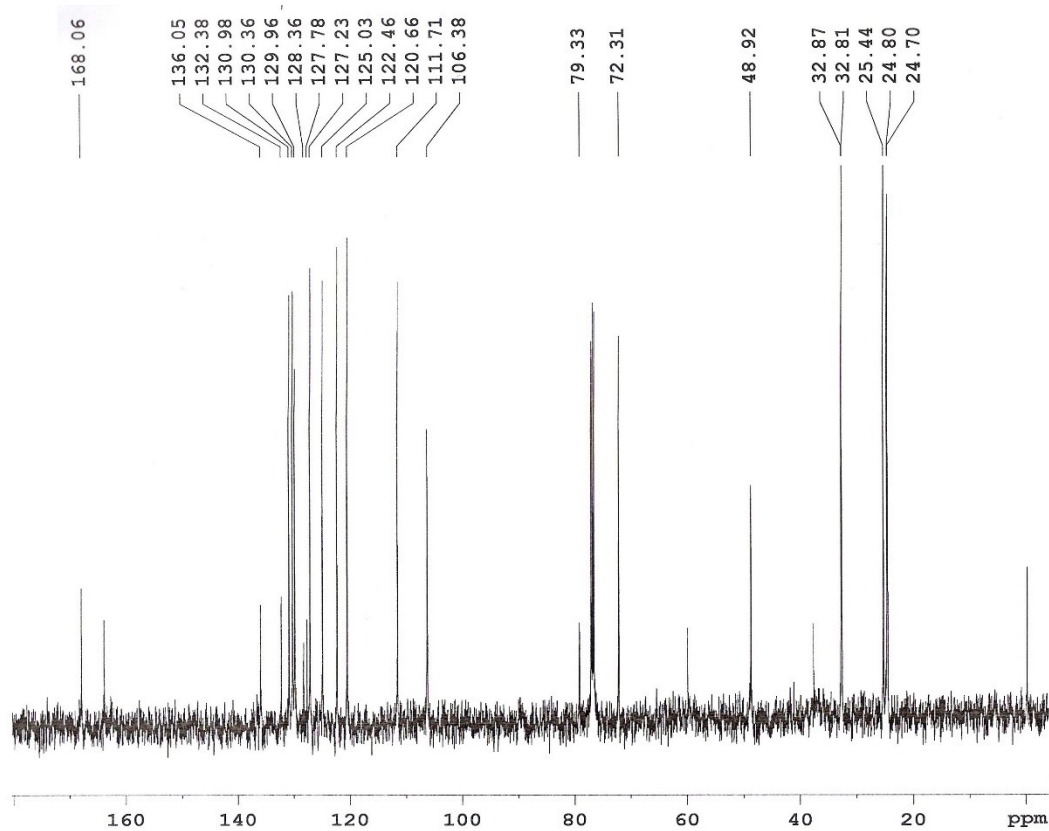

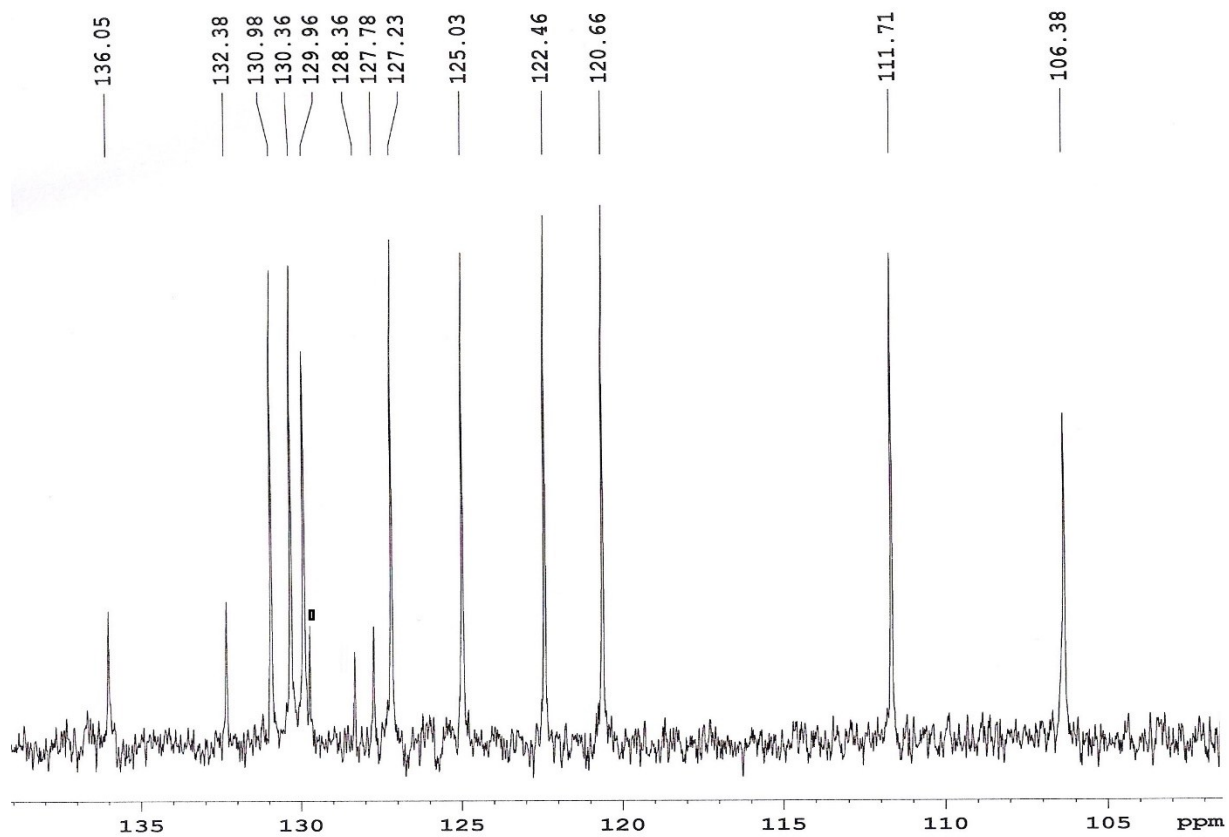

*N*-(2-(Cyclohexylamino)-1-(4-(dimethylamino)phenyl)-2-oxoethyl)-*N*-(prop-2-yn-1-yl)-1*H*-indole-2-carboxamide **1e**

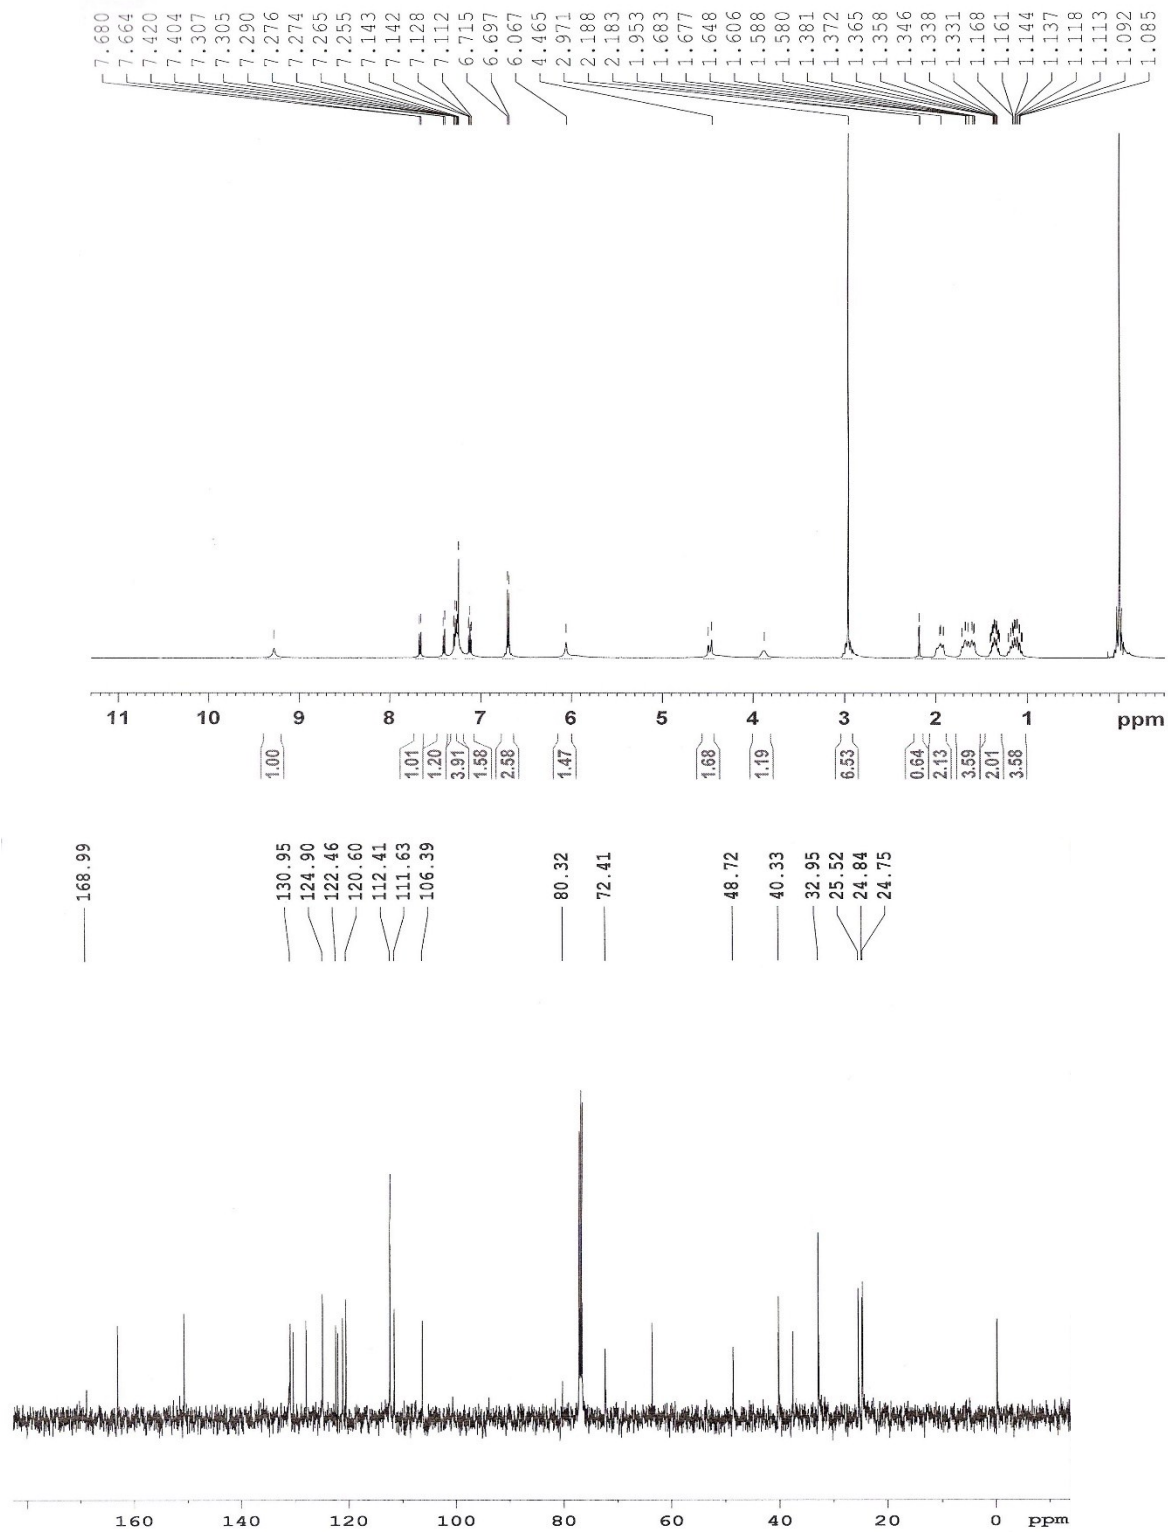



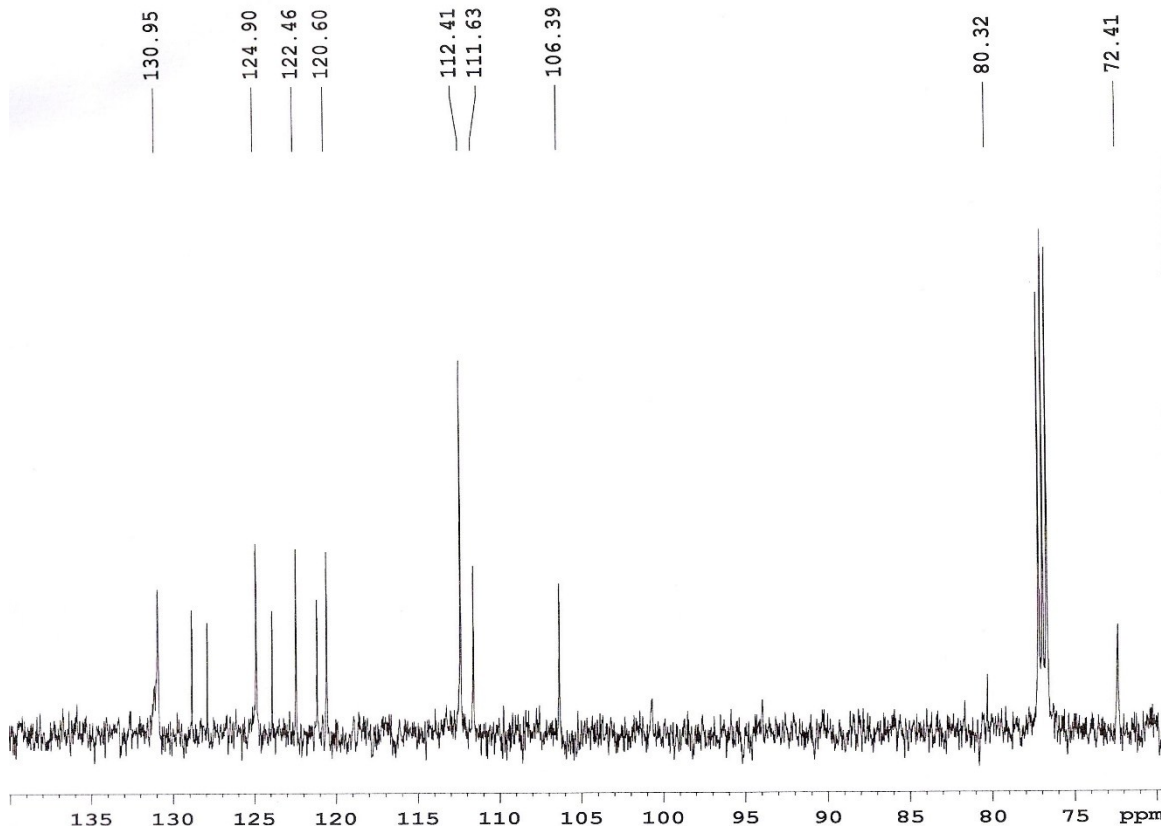

*N*-(2-(*tert*-Butylamino)-2-oxo-1-(*p*-tolyl)ethyl)-*N*-(prop-2-yn-1-yl)-1*H*-indole-2-carboxamide **1f**

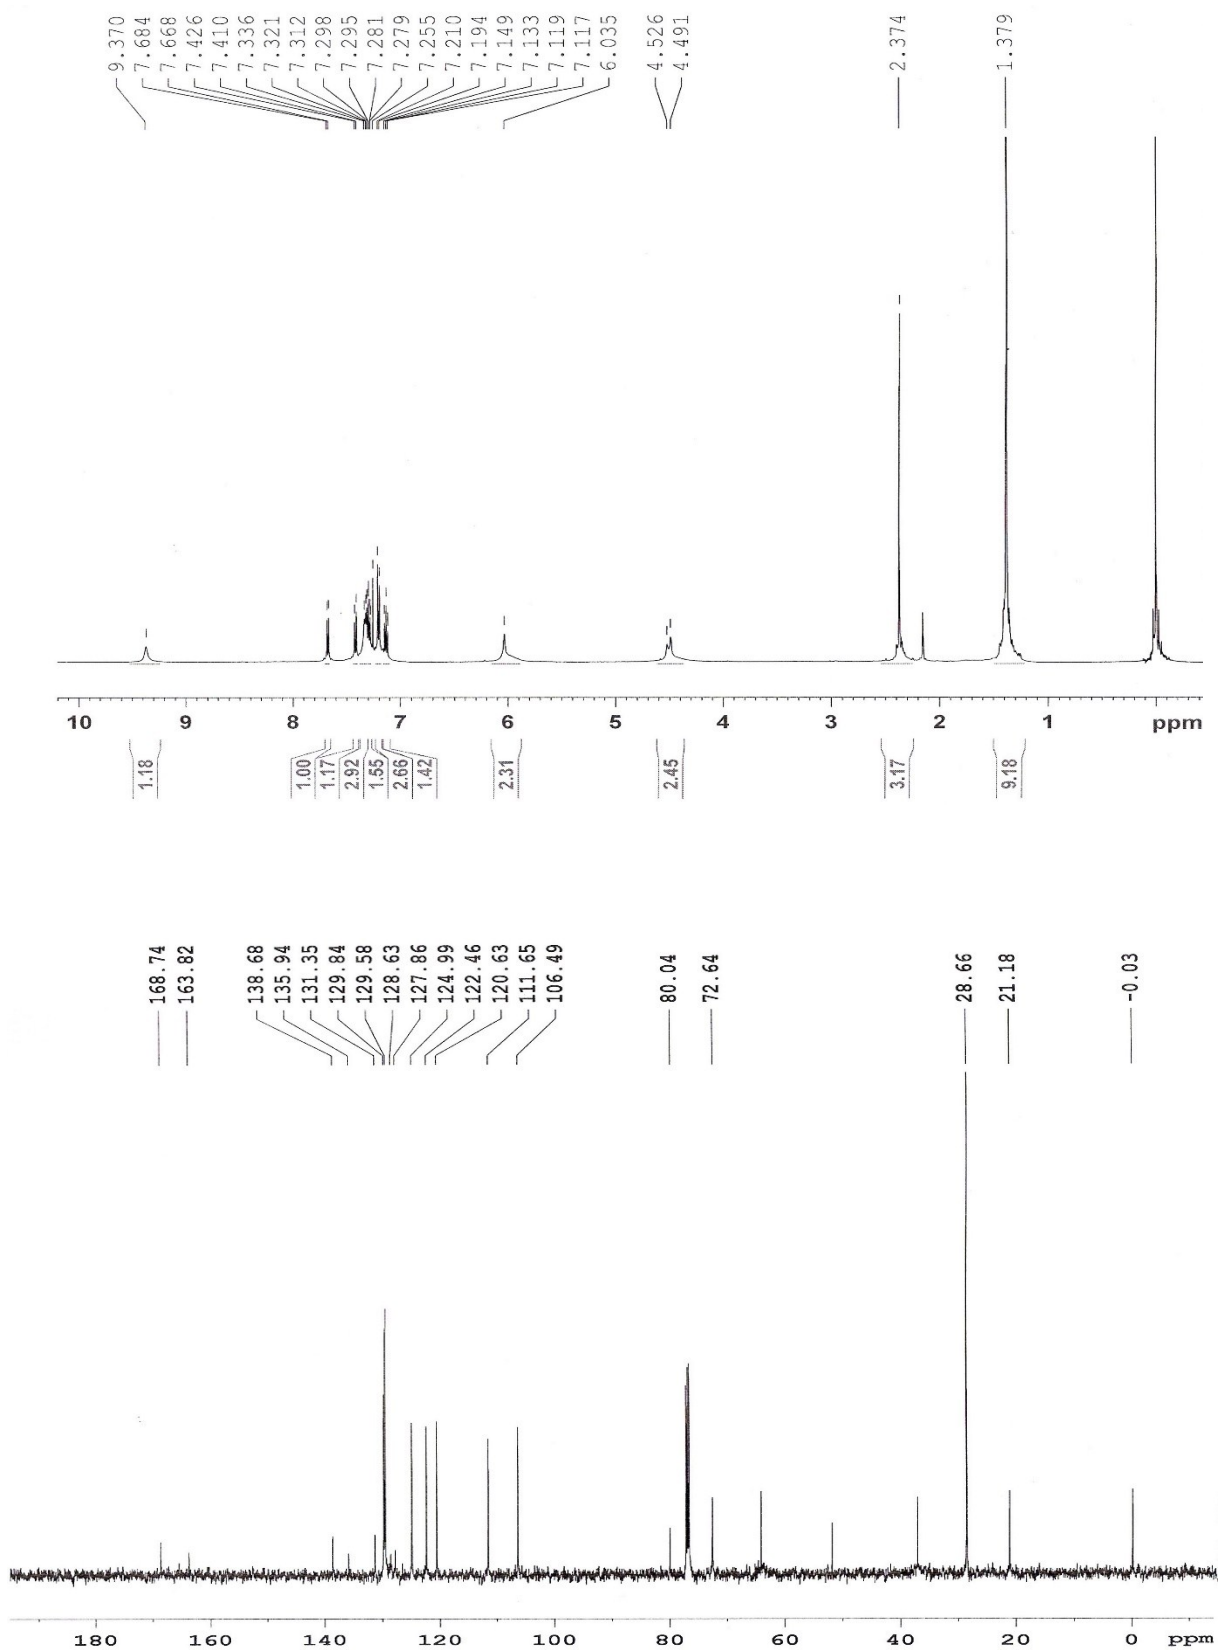

*N*-(2-(*tert*-Butylamino)-1-(4-methoxyphenyl)-2-oxoethyl)-*N*-(prop-2-yn-1-yl)-1*H*-indole-2-carboxamide **1g**

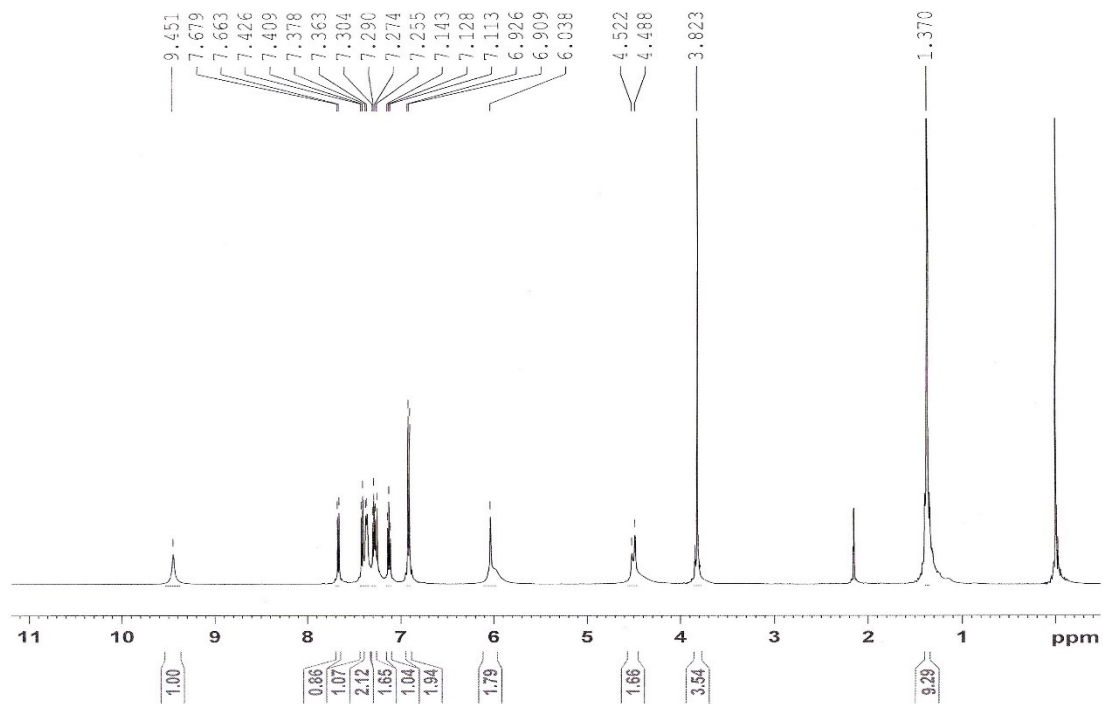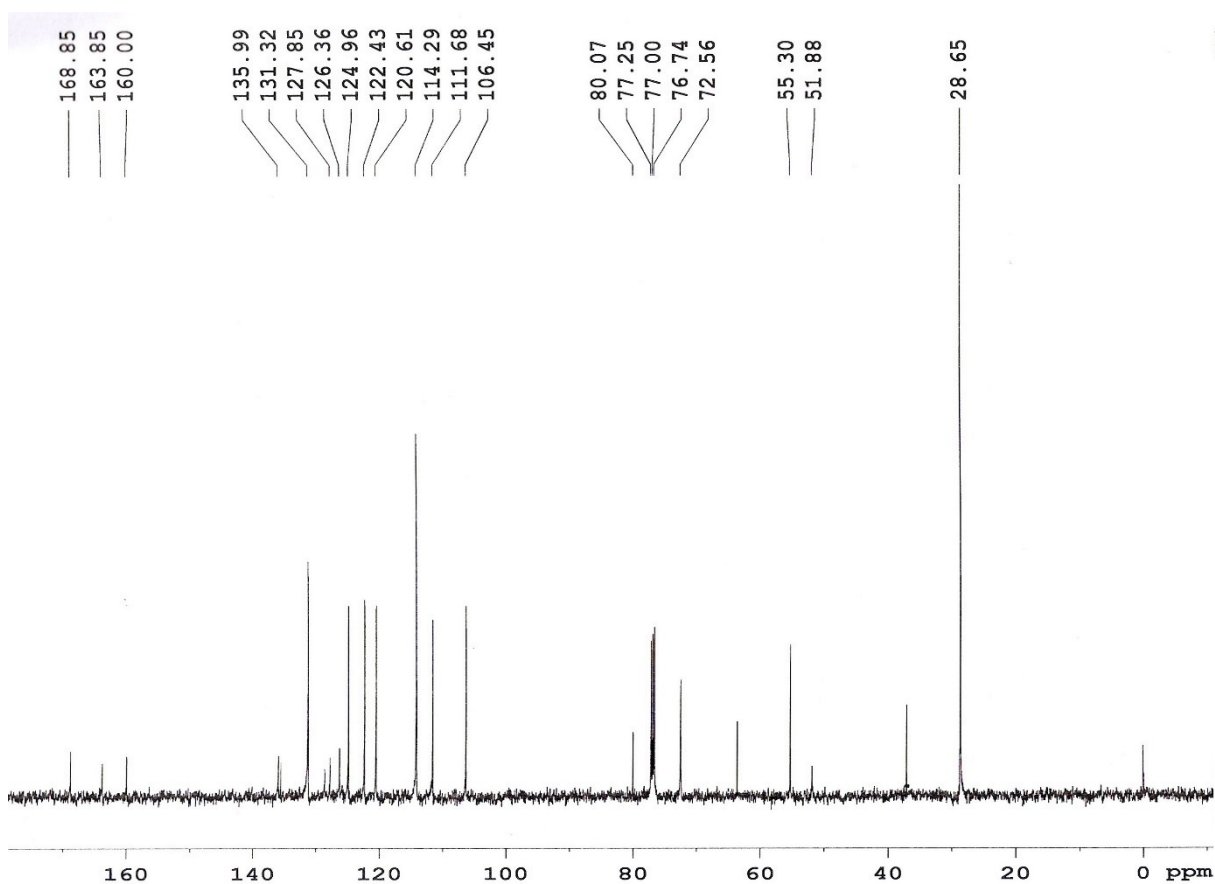

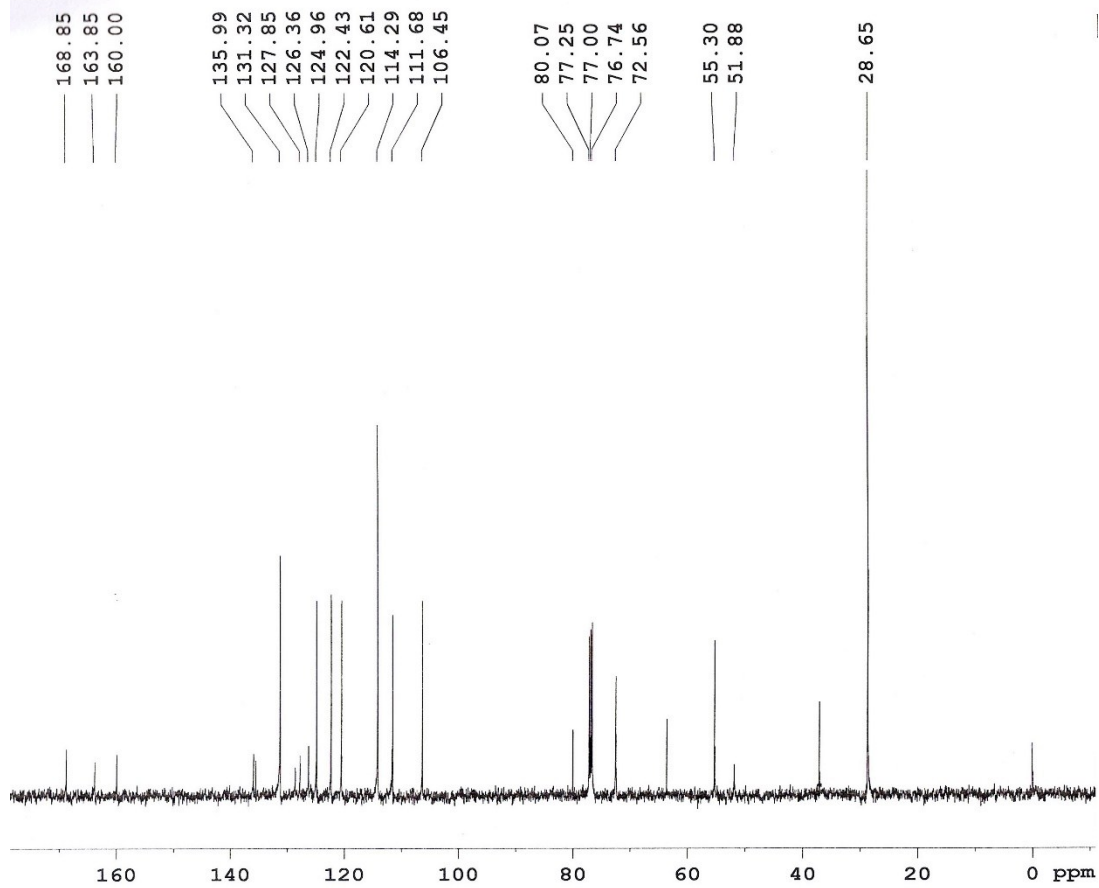

*N*-(2-(*tert*-Butylamino)-1-(2-fluorophenyl)-2-oxoethyl)-*N*-(prop-2-yn-1-yl)-1*H*-indole-2-carboxamide **1h**

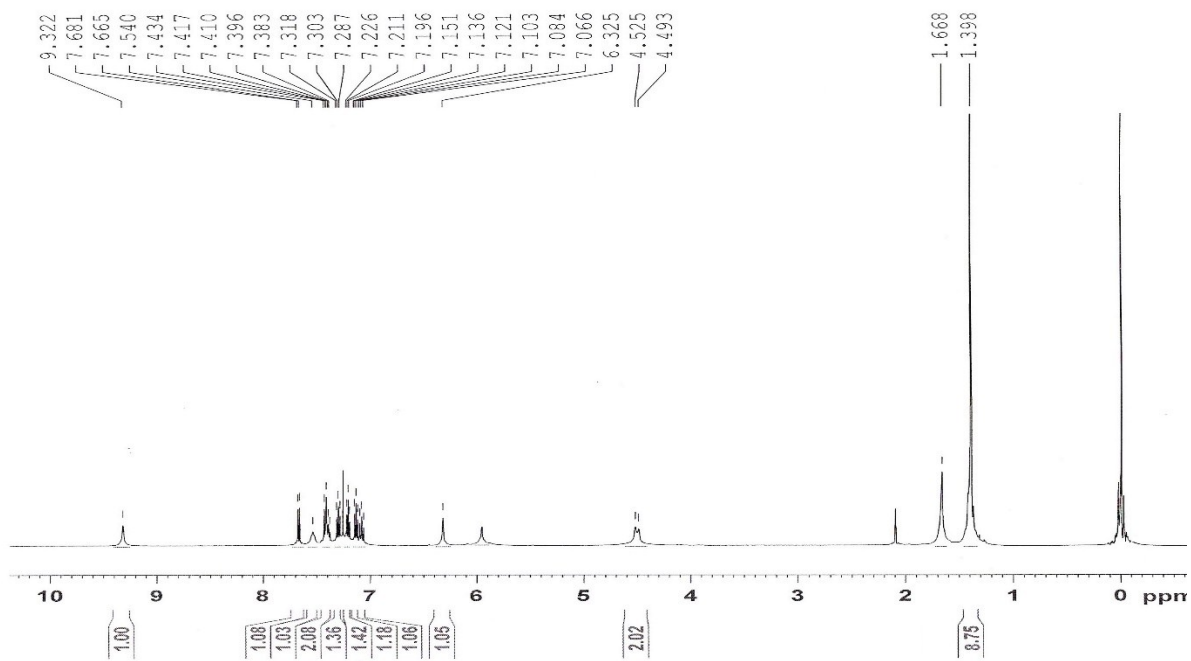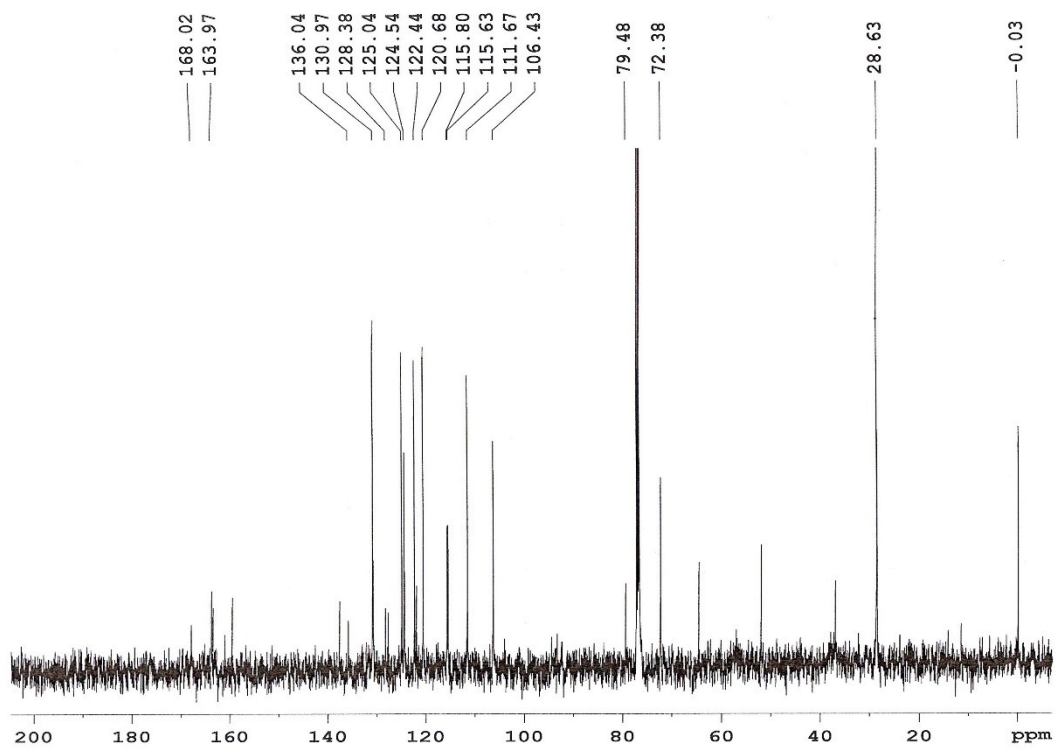

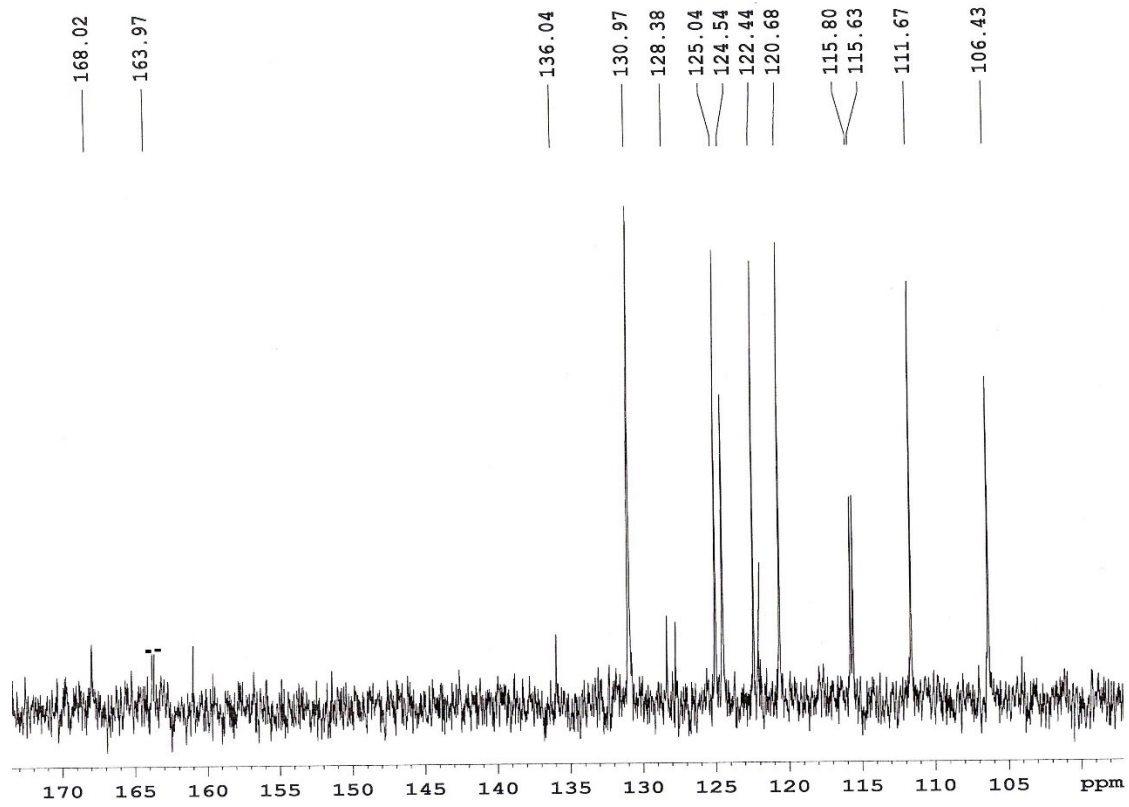

*N*-(2-(*tert*-Butylamino)-1-(2-chlorophenyl)-2-oxoethyl)-*N*-(prop-2-yn-1-yl)-1*H*-indole-2-carboxamide **1i**

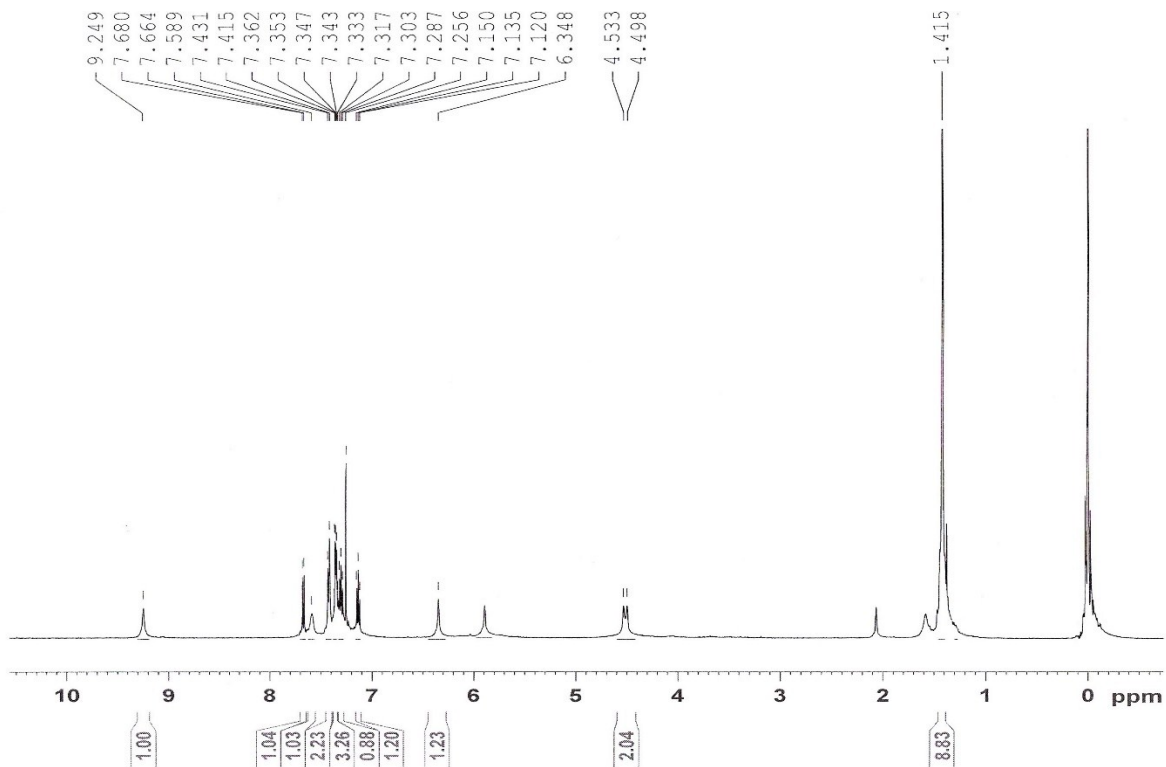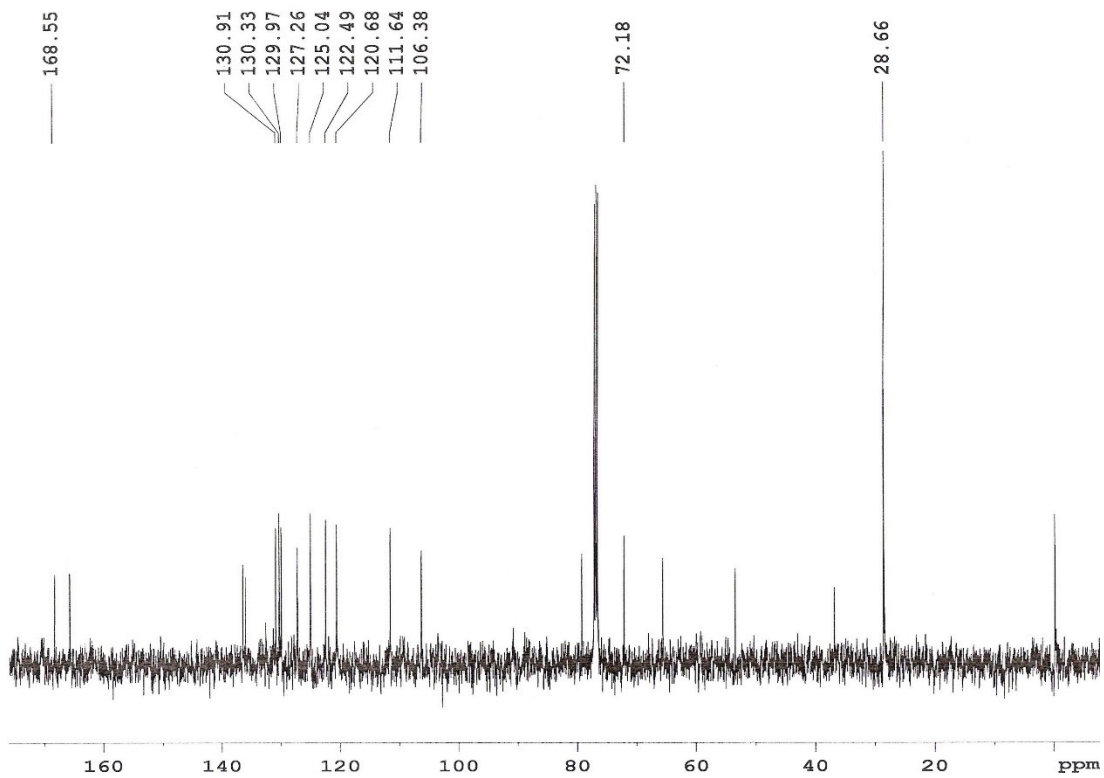

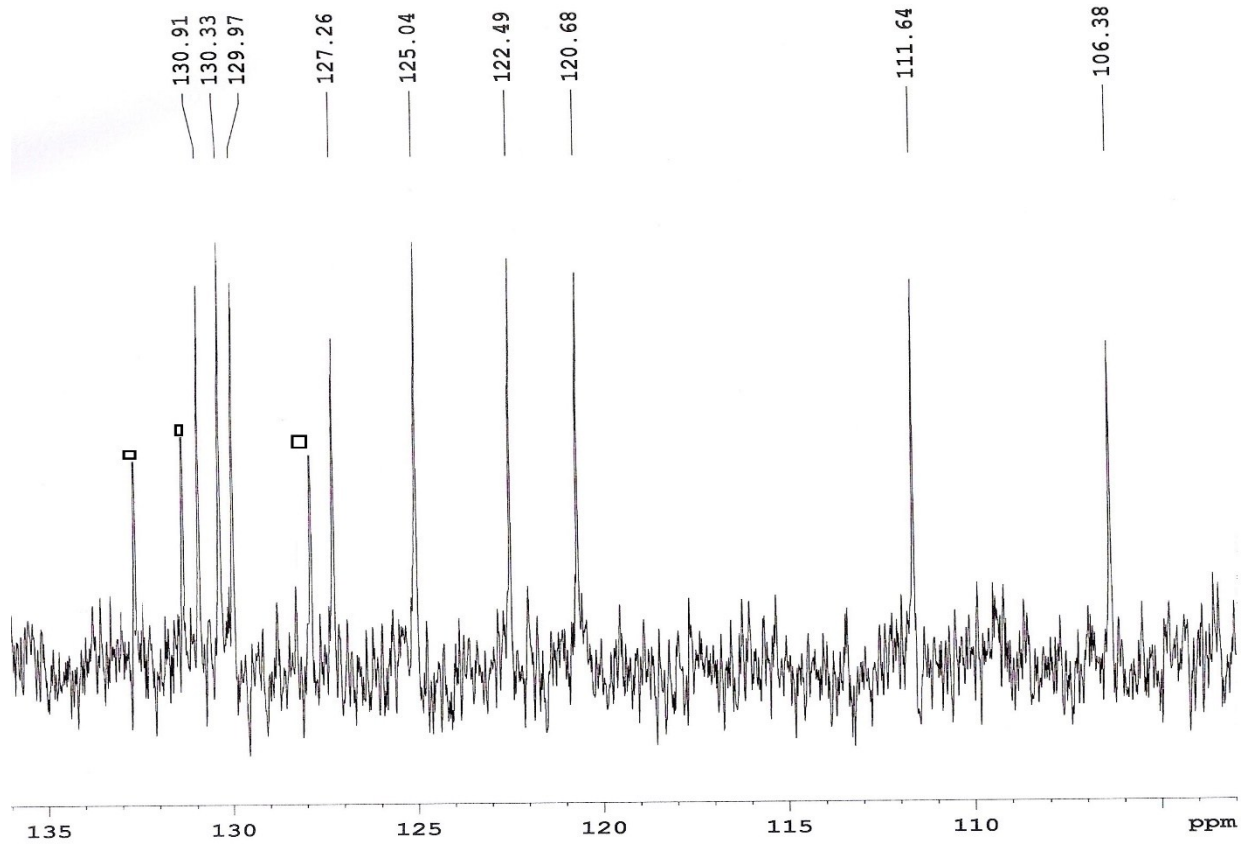



*N*-Cyclohexyl-2-(4-methyl-1-oxopyrazino[1,2-*a*]indol-2(1*H*)-yl)-2-phenylacetamide **2a**

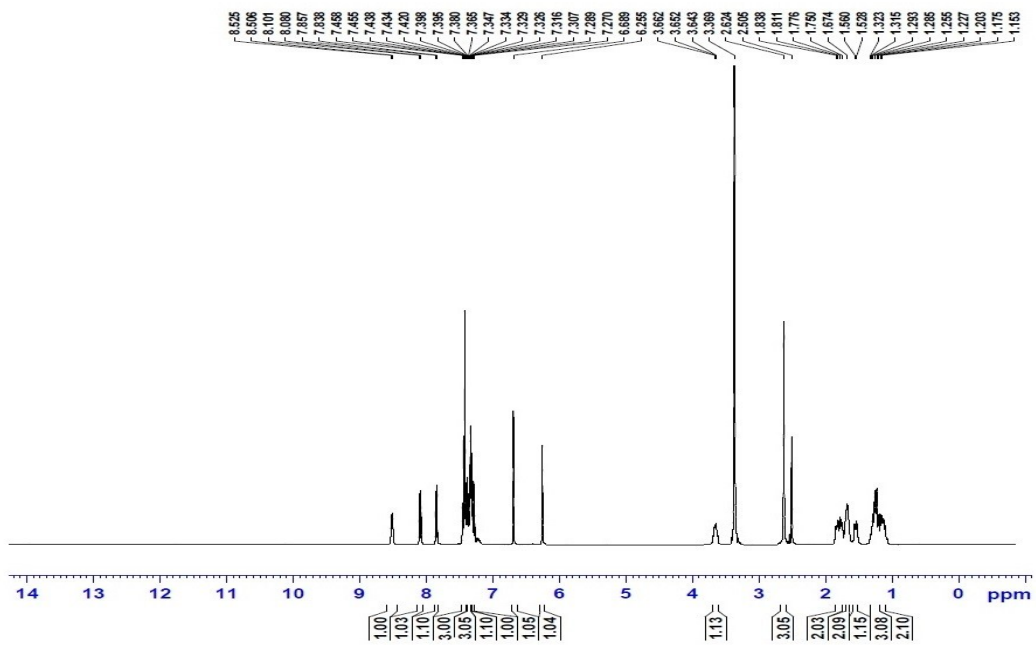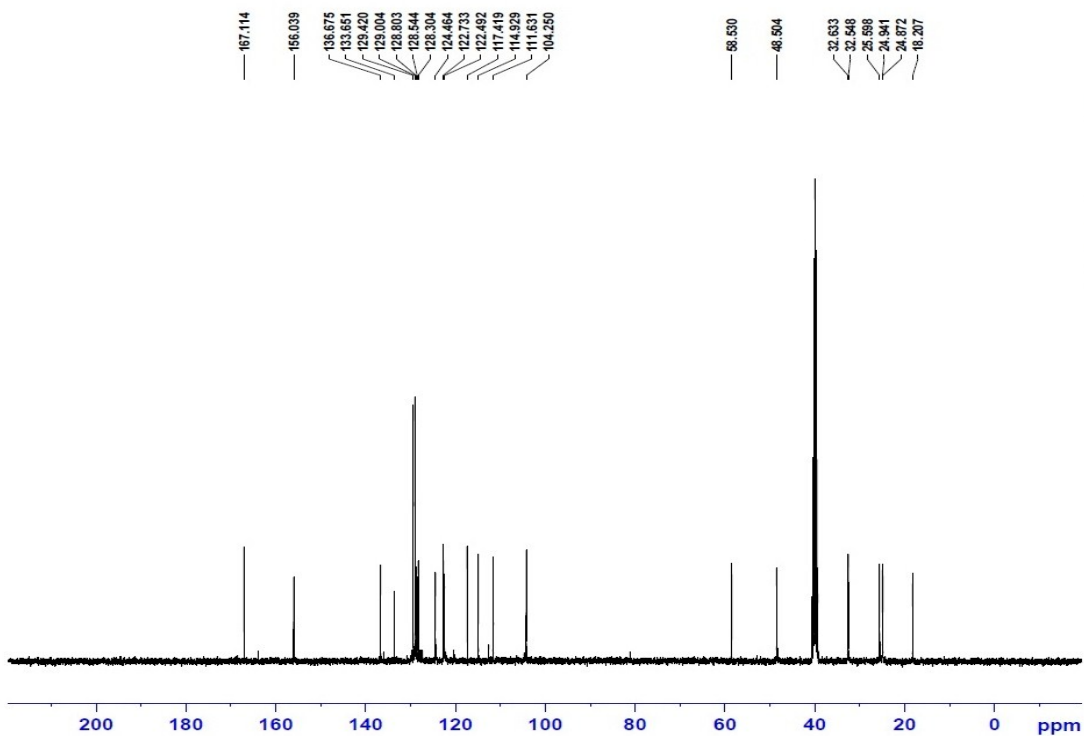

*N*-Cyclohexyl-2-(4-methyl-1-oxopyrazino[1,2-*a*]indol-2(1*H*)-yl)-2-(*p*-tolyl)acetamide **2b**

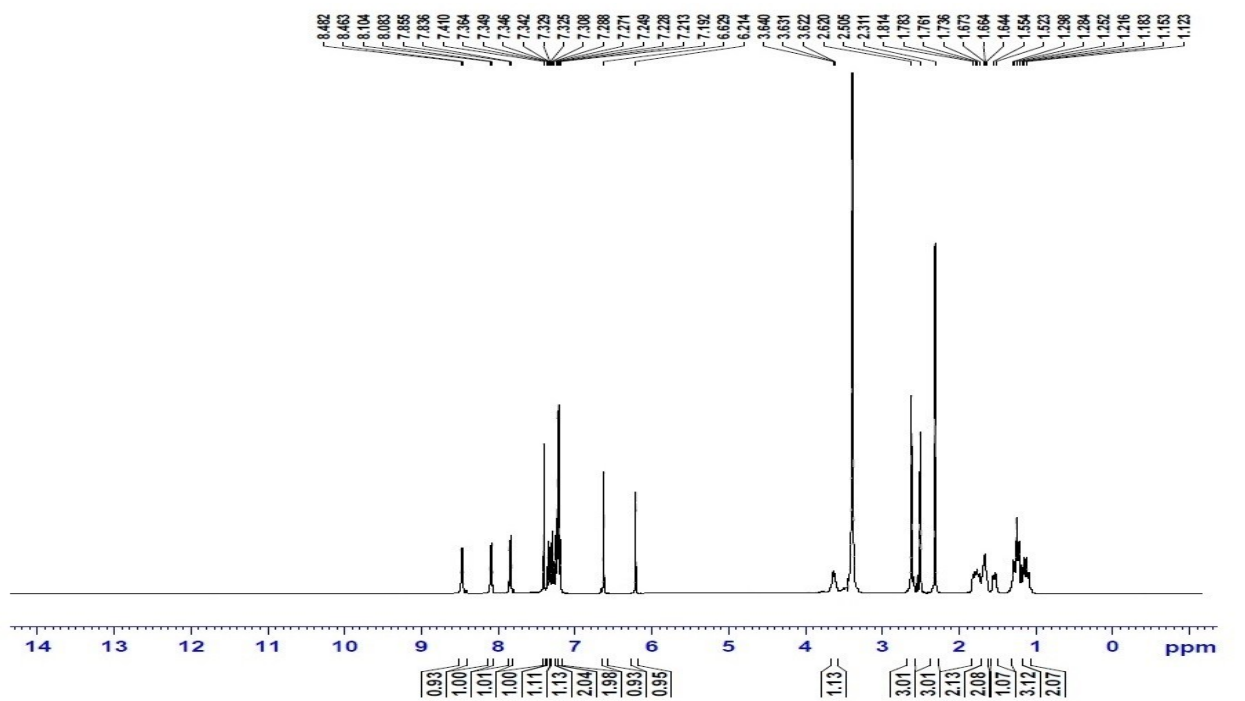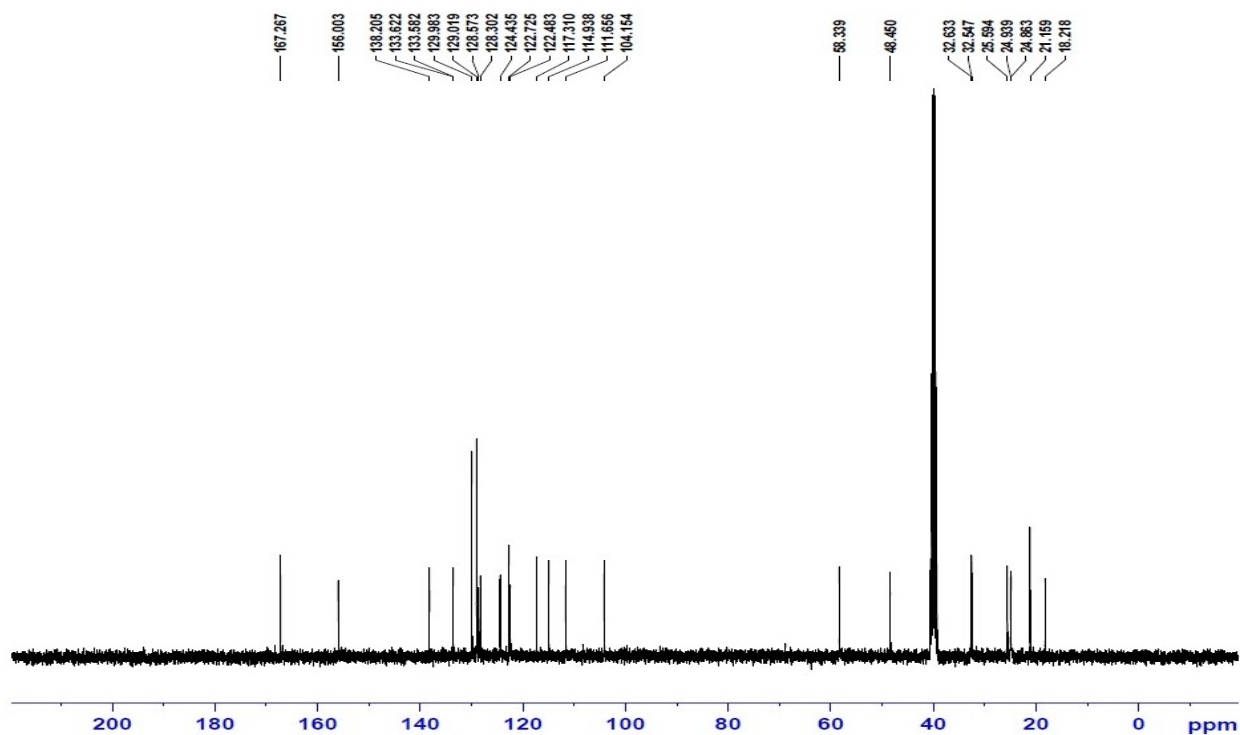

*N*-Cyclohexyl-2-(4-methoxyphenyl)-2-(4-methyl-1-oxopyrazino[1,2-*a*]indol-2(1*H*)-yl)acetamide **2c**

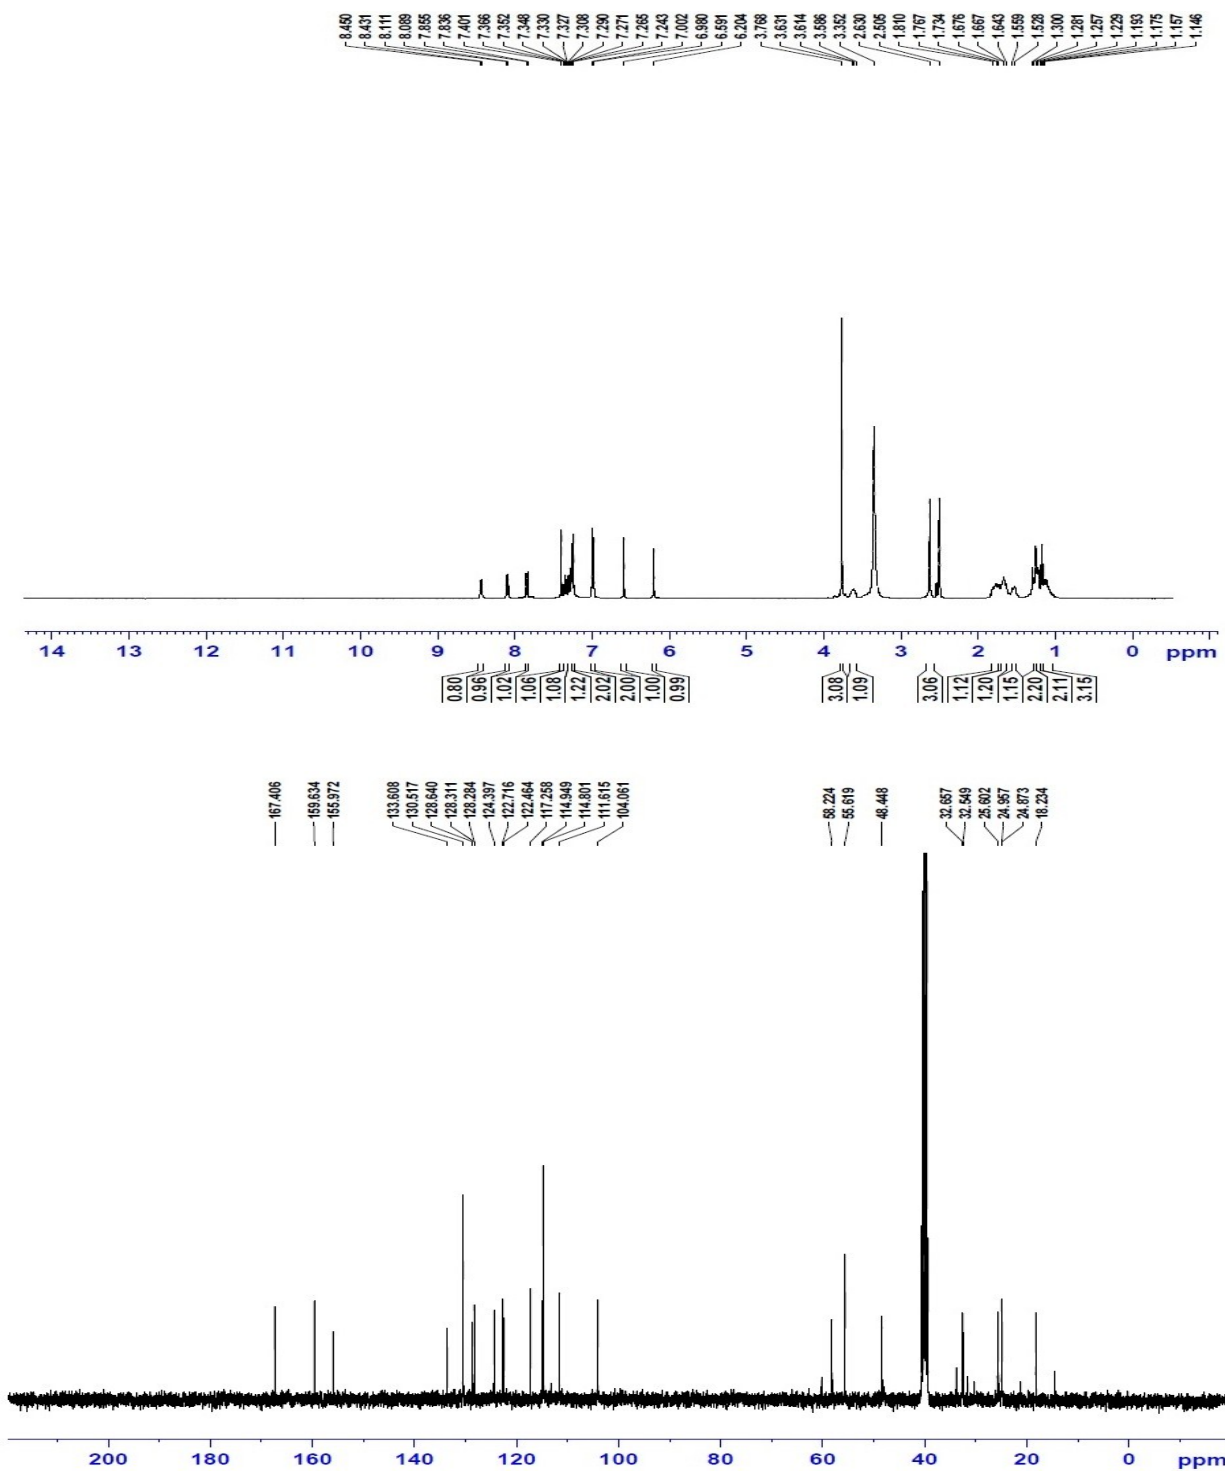

2-(2-Chlorophenyl)-N-cyclohexyl-2-(4-methyl-1-oxopyrazino[1,2-a]indol-2(1H)-yl)acetamide **2d**

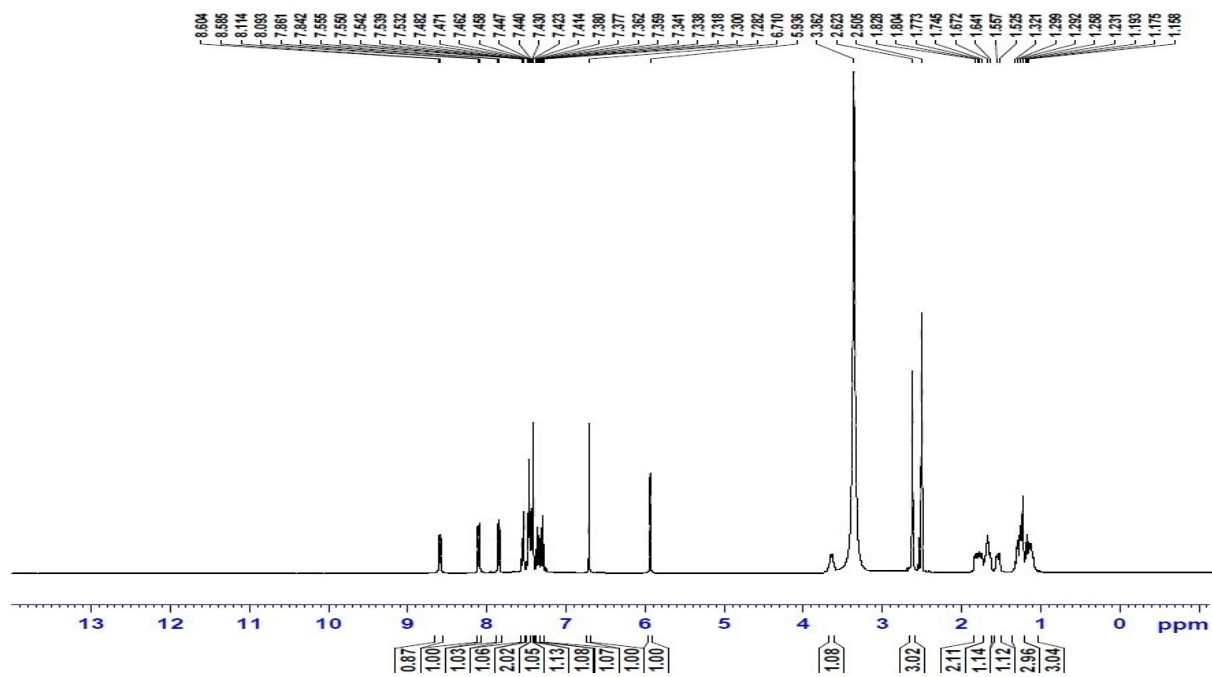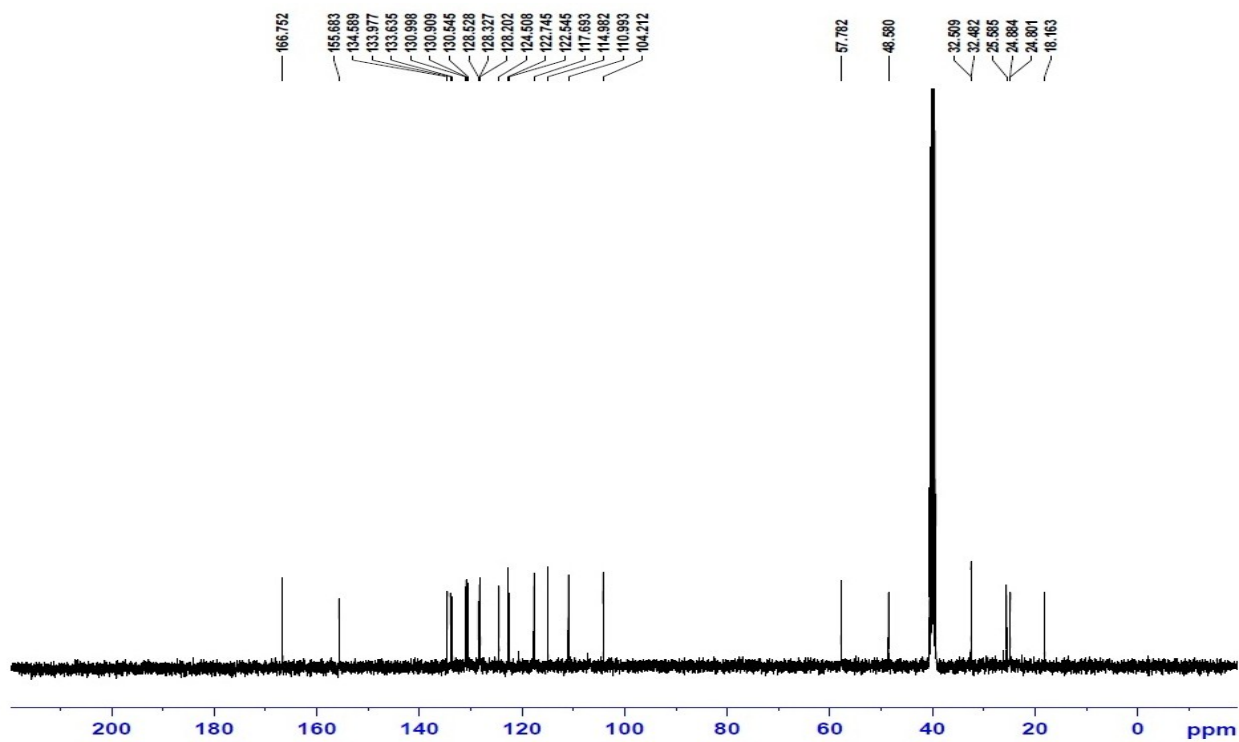

*N*-Cyclohexyl-2-(4-(dimethylamino)phenyl)-2-(4-methyl-1-oxopyrazino[1,2-*a*]indol-2(1*H*)-yl)acetamide **2e**

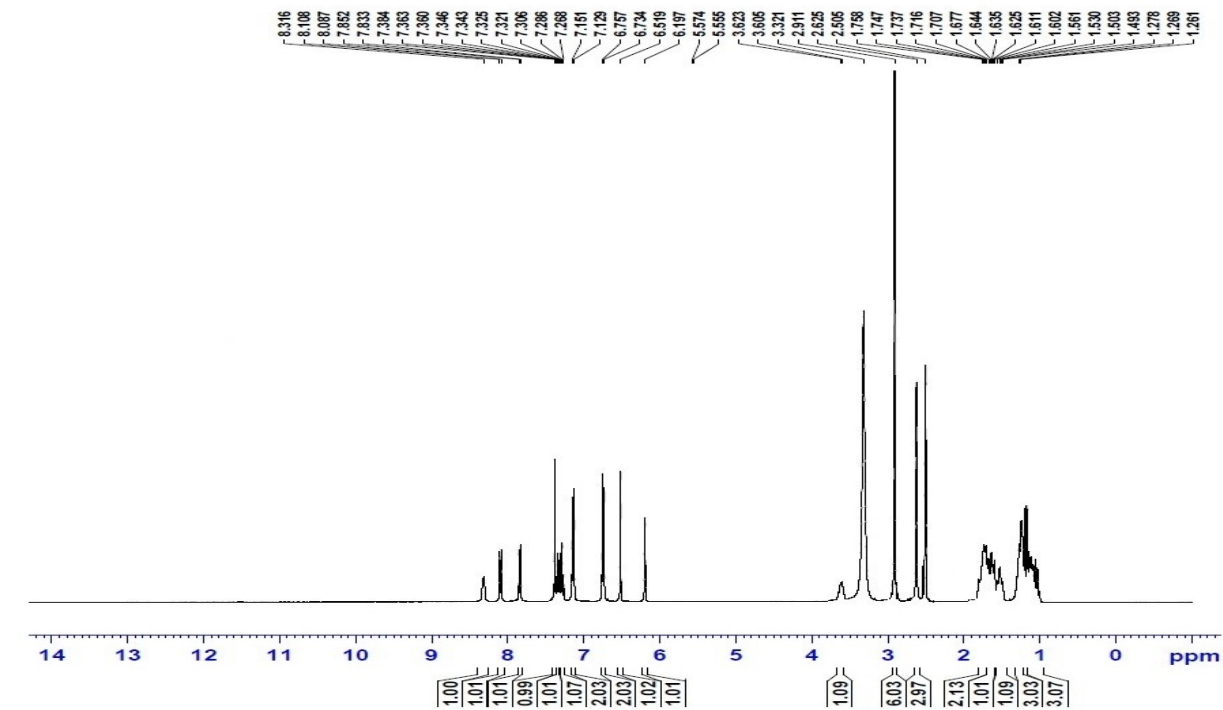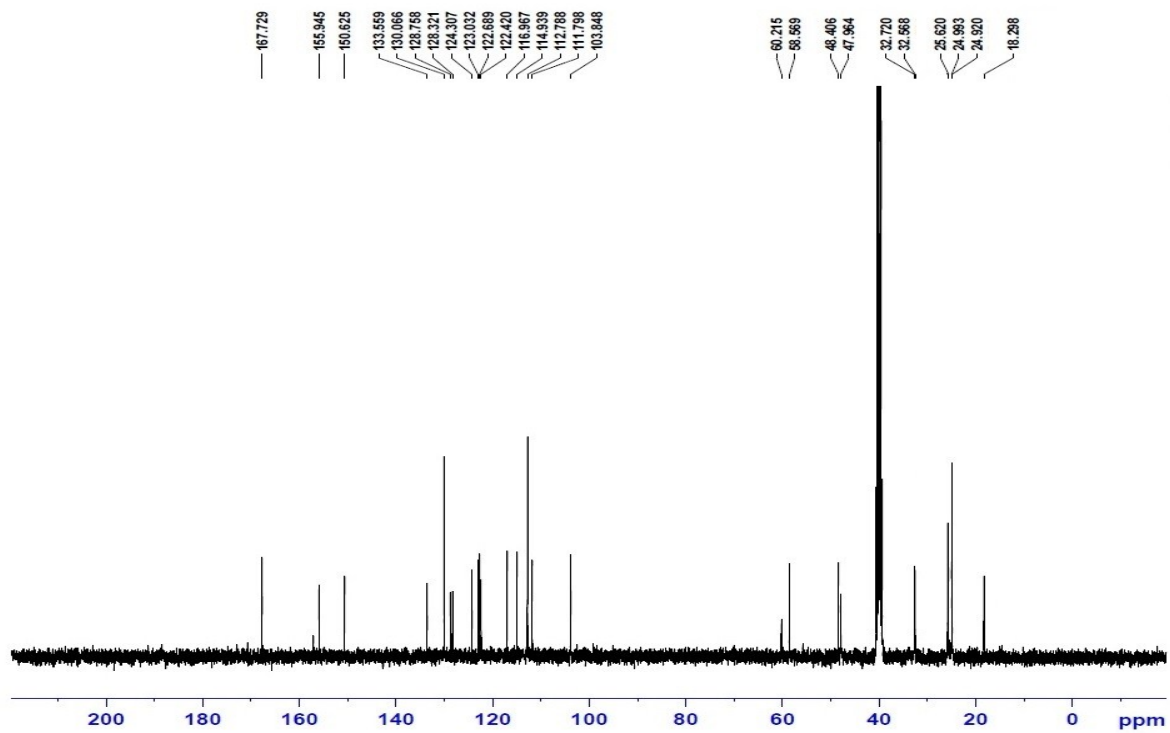

*N*-(*tert*-Butyl)-2-(4-methyl-1-oxopyrazino[1,2-*a*]indol-2(1*H*)-yl)-2-(*p*-tolyl)acetamide **2f**

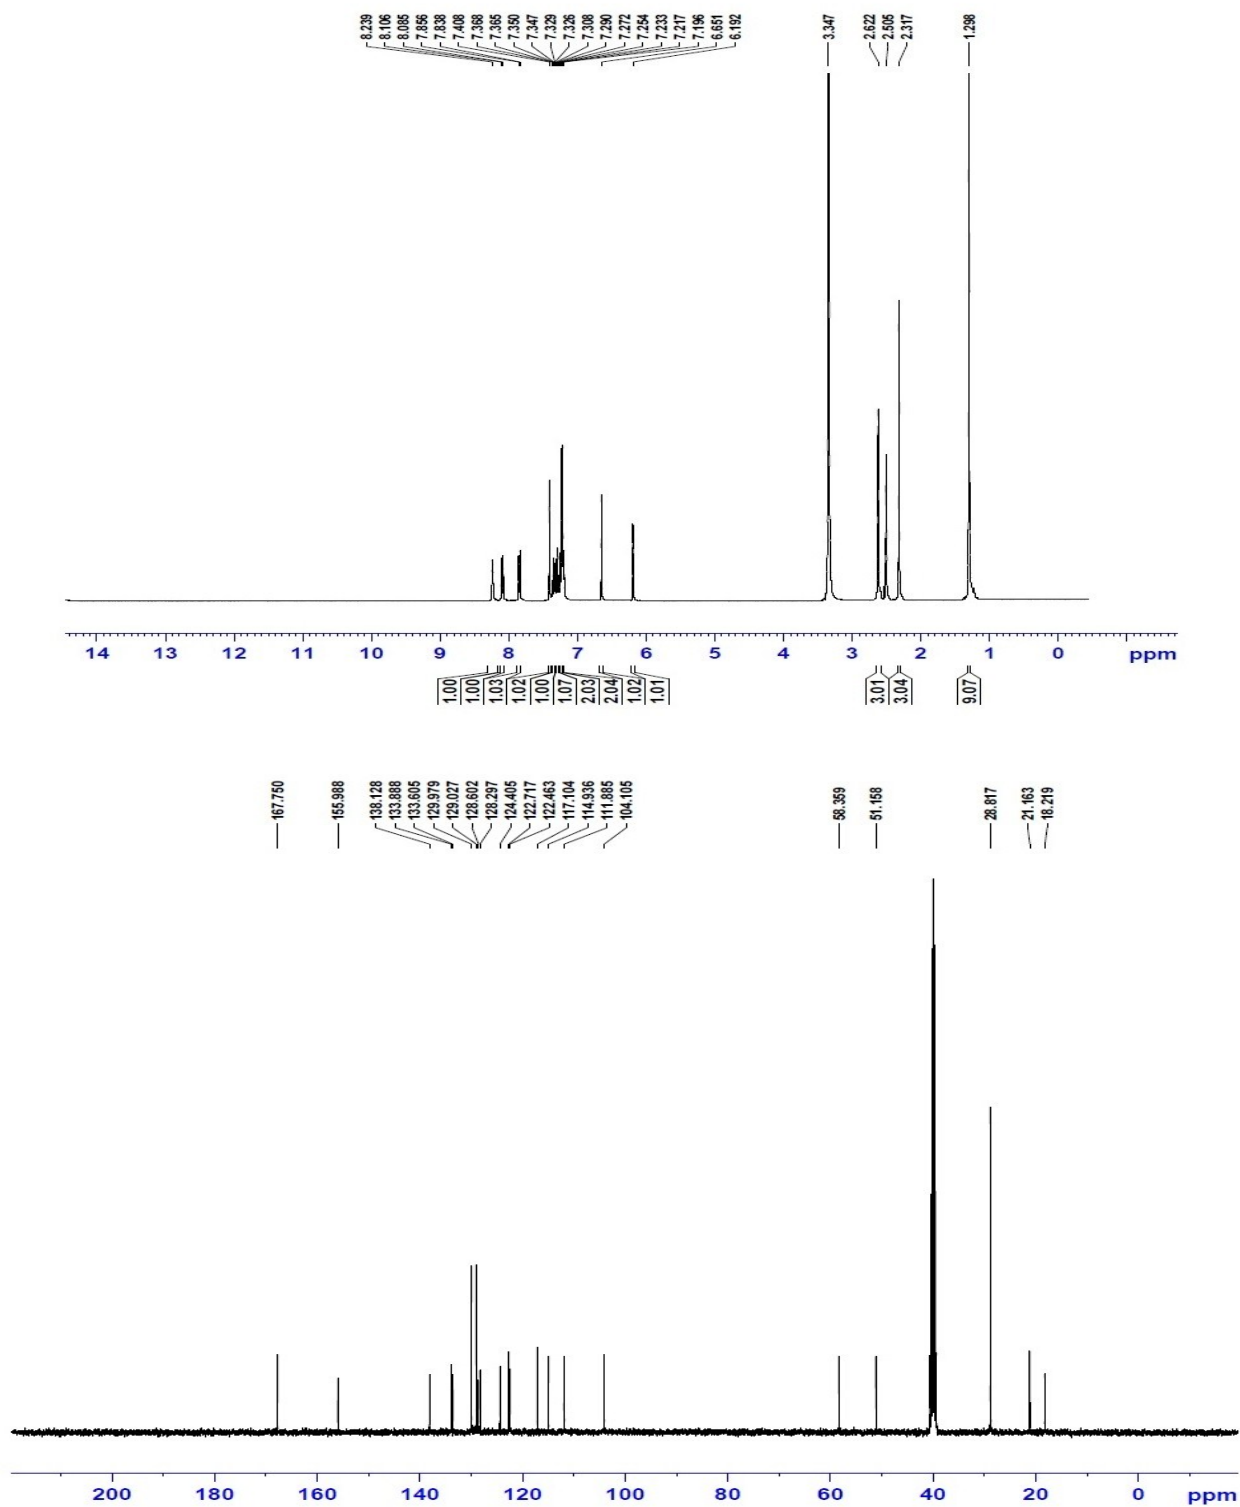

*N*-(*tert*-Butyl)-2-(4-methoxyphenyl)-2-(4-methyl-1-oxopyrazino[1,2-*a*]indol-2(1*H*)-yl)acetamide **2g**

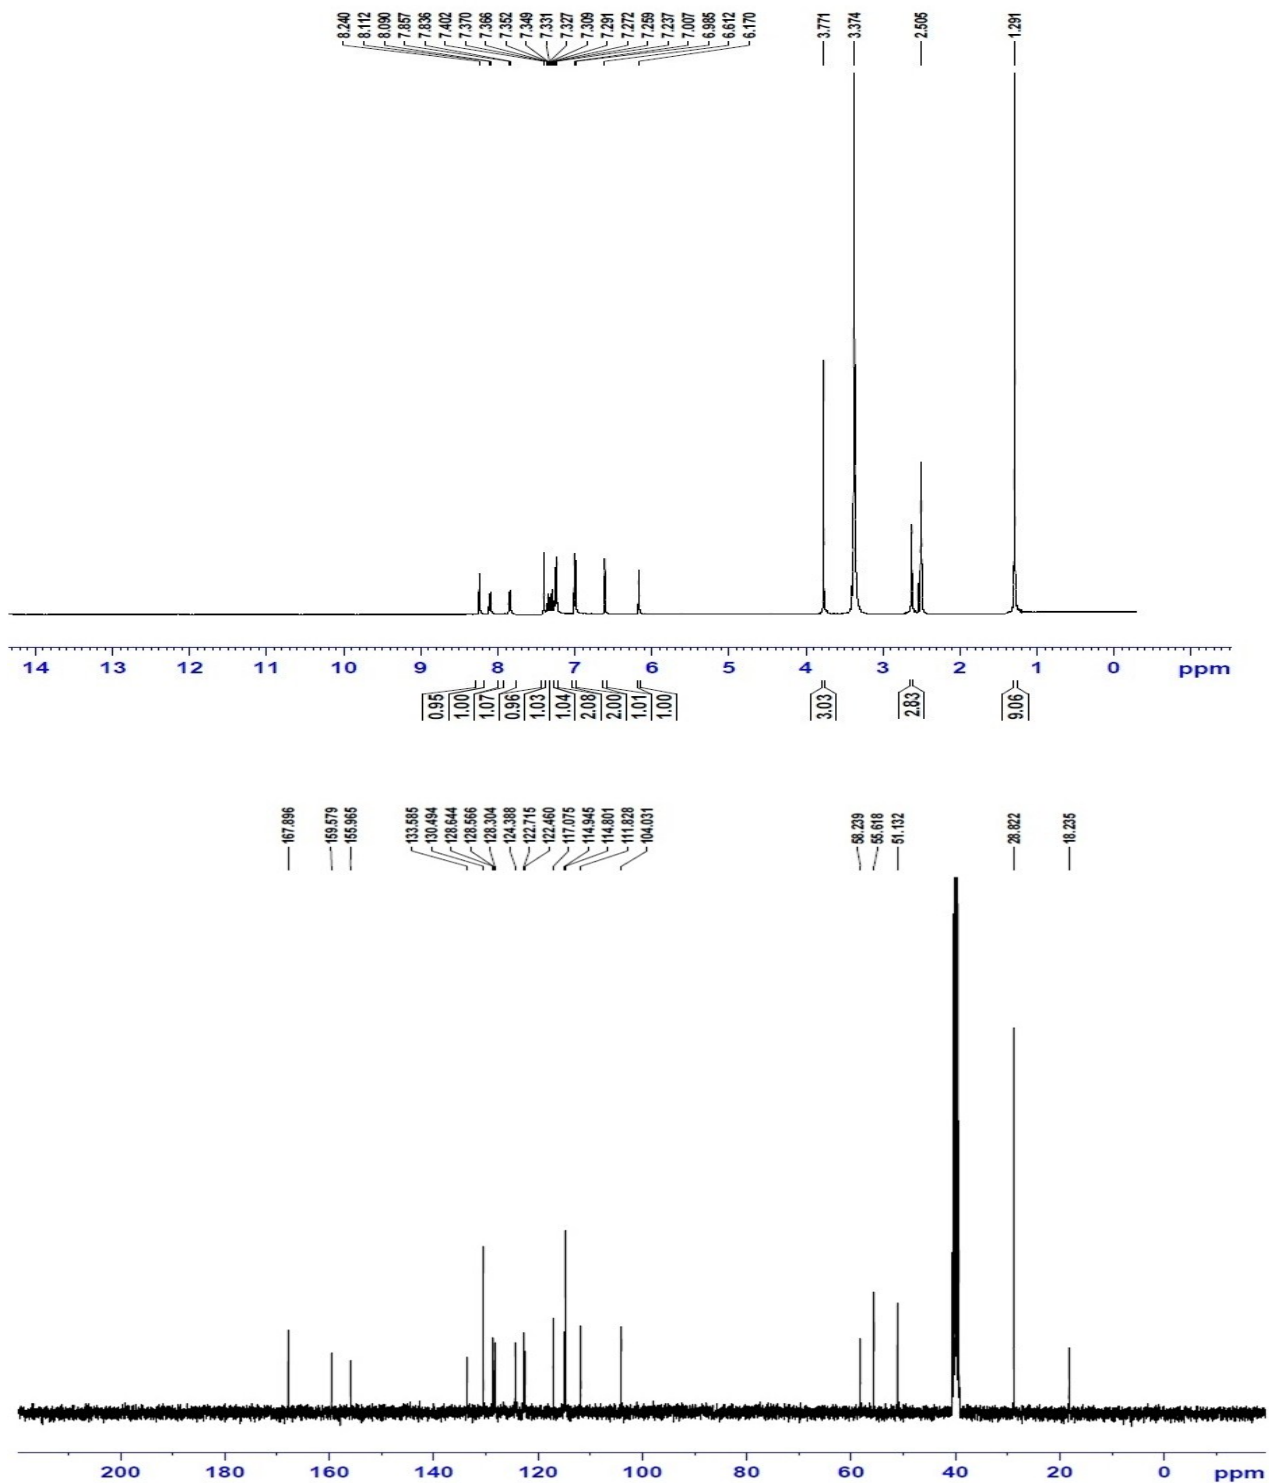

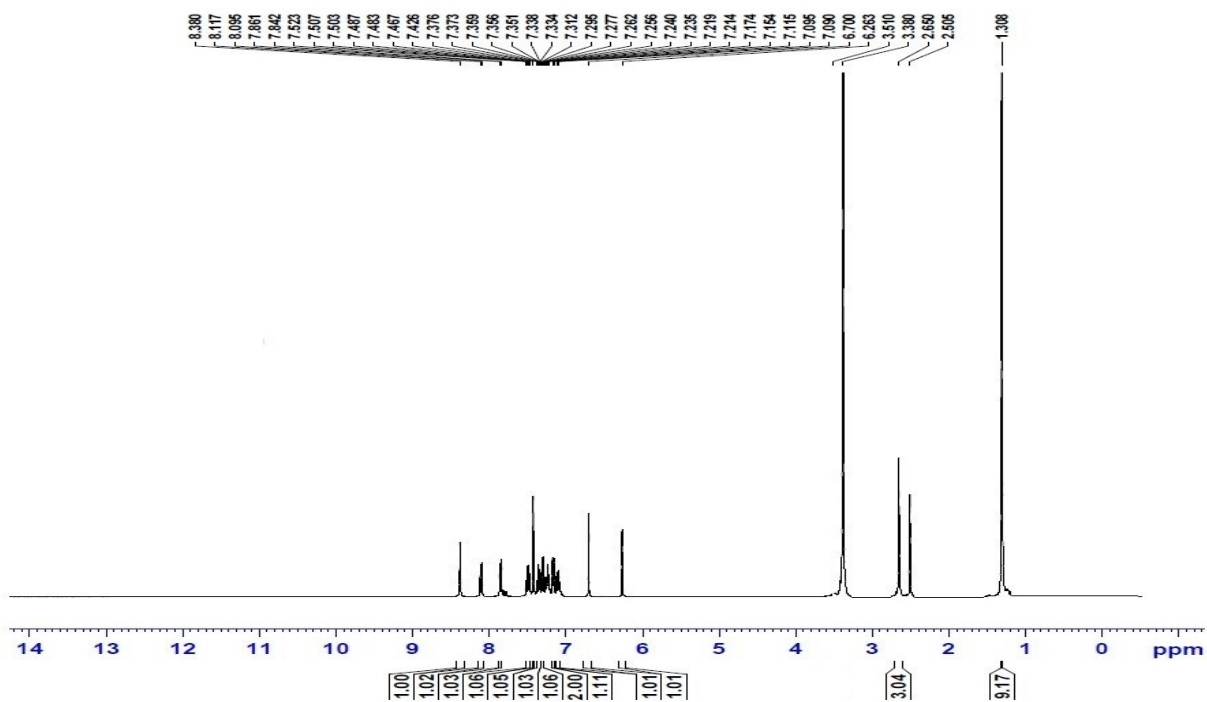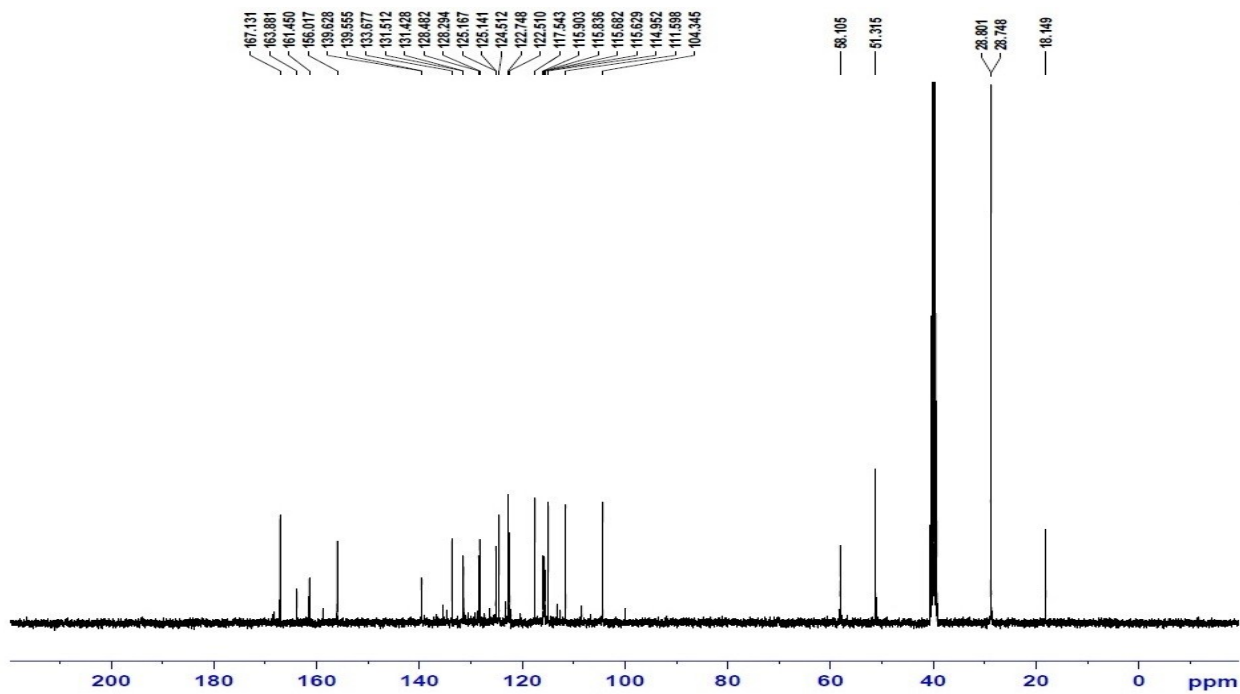



*N*-(*tert*-Butyl)-2-(2-chlorophenyl)-2-(4-methyl-1-oxopyrazino[1,2-*a*]indol-2(1*H*)-yl)acetamide **2i**

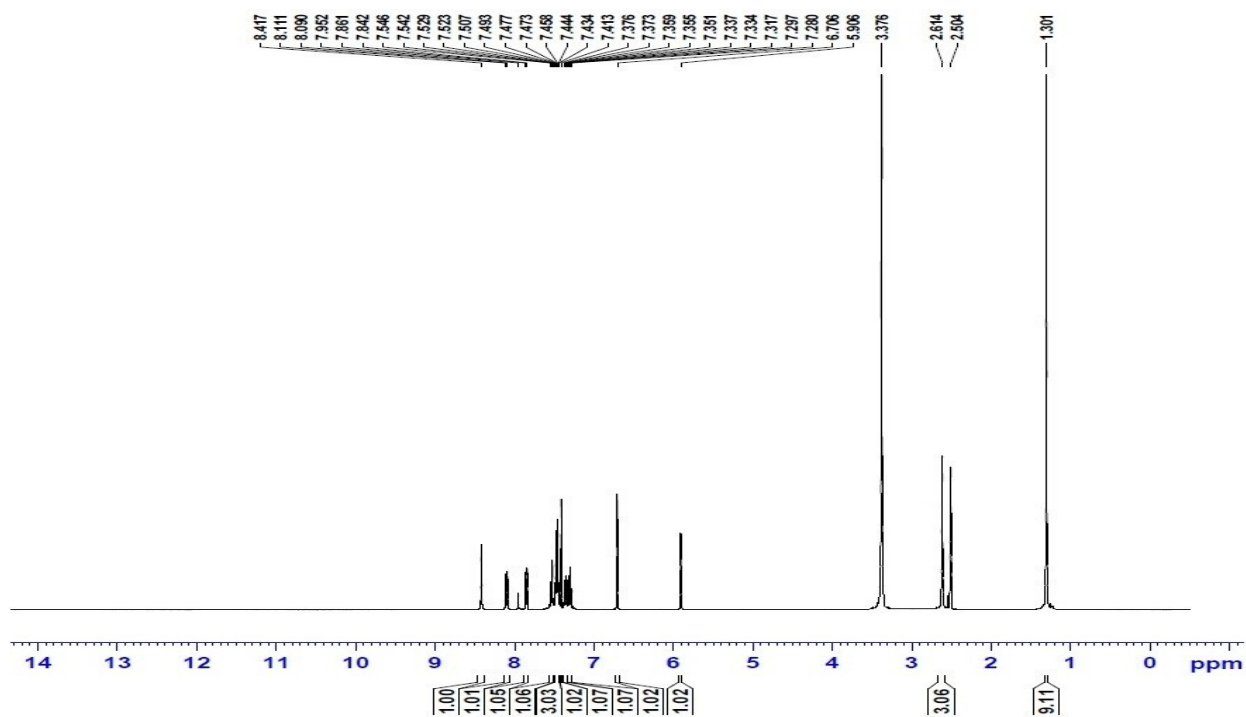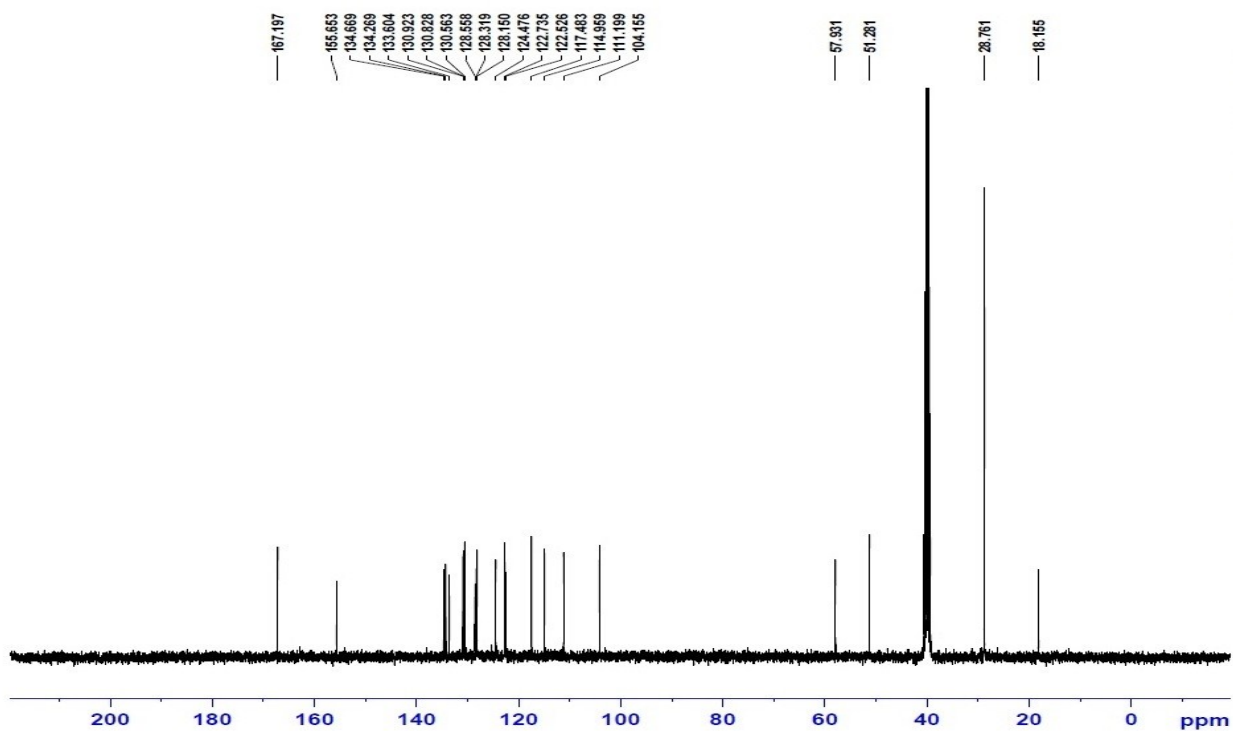

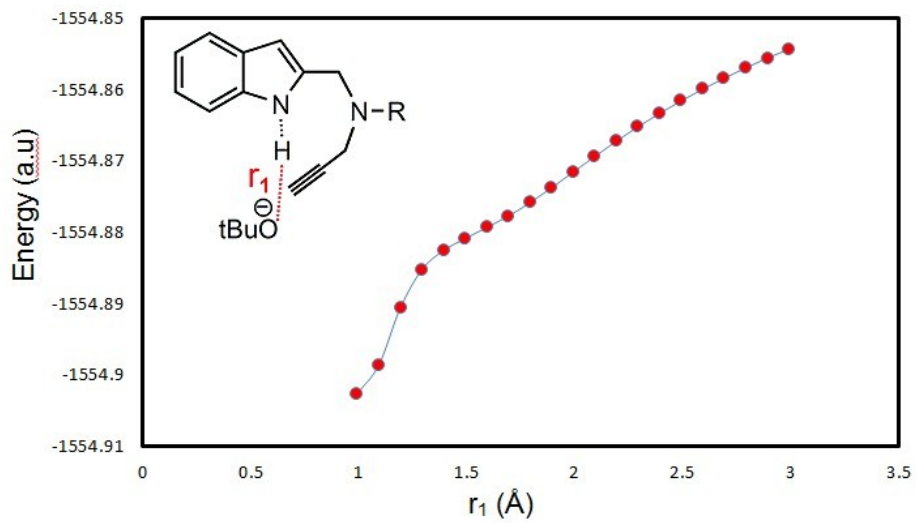

**Figure S1** Relaxed PES scan calculated at the B3LYP/BS1 level of theory in DMF using the CPCM solvation model. This plot suggests that corresponding deprotonation does not have any enthalpic activation barrier.

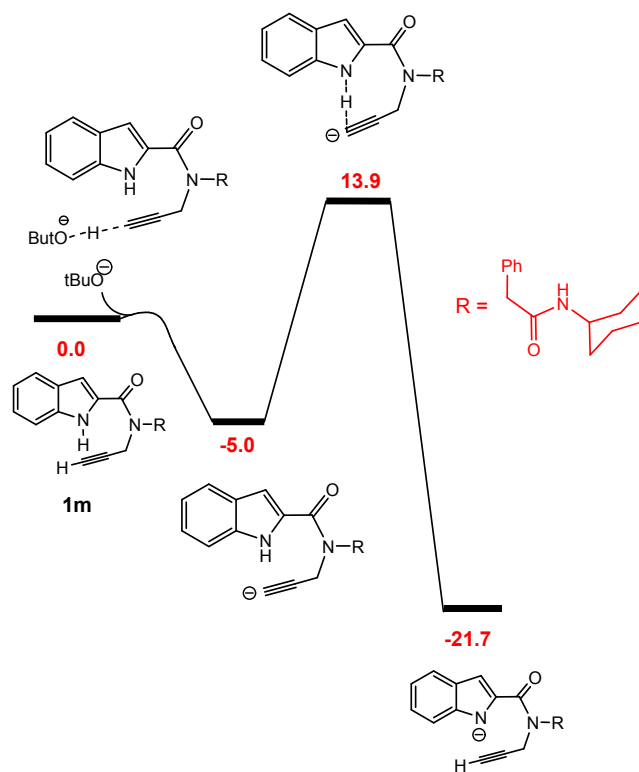

**Figure S2** Another alternative pathway for deprotonation of indole N-H bond (pathway C). The relative free energies obtained from the M06/6-311+G(2d,p)//B3LYP/6-31G(d) calculations in DMF are given in kcal/mol.

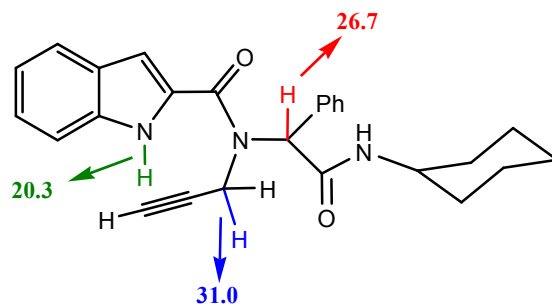

**Figure S3** The pKa values for some selective protons calculated based on the methodology given in the following reference: H. Batebi, F. Zarkoob, K. Daraei, B. Y. Yates, A. Ariaifard, *J. Organomet.* **2013**, **748**, 89.
